# Supplementary material for: HIV and Syphilis in Pregnancy: A Cross-Sectional Analysis from Healthcare Facilities in Southern Tanzania
Source: Research Square preprint supplement (doi:10.21203/rs.3.rs-5871728/v1), 2025-01-28
Supplement: Supplementary file 1 [file 985cb4d5f595fc37e94a43ef.xlsx]

## Sheet: Sheet1
s/n	Date	DOB	Age (years)	Age cat	Residence status	Occupation	Education	Education cat	Marital_status	Income_per day(Tsh)	Income cat	Vaccination_status	Reason _(No vaccination)	Scarification_status/tattooed	Surgical procedure	Facility (surgical procedure)-Health/Tradit	Blood transfusion_status	Dental procedure_status	Jaundice_status	Sexual Partners_number	Sexual partner cat	STIs_status	History of STIs	Pregnancies_number	No of pregnancies_cat	Live children_number	No of live children_cat	Place of delivery	Previous place of delivery	Abortion_Miscarriage	Current gestation age	CD4_status (cells/ul)	CD4 cat	WHO_Clinical staging of HIV	HIV-VL_status < 6 months (cp/ml)	HVLcat	ART_regimen	ART regimen_cat	Duration_on ART(months)	Duration on ART cat	HBsAg_result	S/CO (Syphilis)	S/CO cat (syphilis)	S/CO (HBV)	S/CO cat(HBV)	Final_Syphilis result	Date of testing
1	2022-03-02	1991-07-15	30.6306	18-39	Urban	Unemployed	Primary education	Primary	Single	2000	< 2400	No	Don't know about it	No	No	Not applicable	No	No	No	1	One	No	No	3	Multigravida	2	Two-three	Regional Referral Hospital	Health facility	No	First trimester	676	≥500	Clinical stage-2	Target Not Detected	<50	TLD	First-line regimen	72	>12	Negative	<1	<1	<1	<1	Negative	2022-04-26
2	2022-03-02	1986-07-15	35.6306	18-39	Urban	Unemployed	Ordinary level	Secondary	Married	2000	< 2400	No	Don't know about it	No	Yes	Hospital	Yes	Yes	Yes	1	One	Yes	Yes	2	Multigravida	1	One	Health Center	Health facility	No	First trimester	620	≥500	Clinical stage-1	Target Not Detected	<50	TLD	First-line regimen	48	>12	Negative	<1	<1	<1	<1	Negative	2022-04-26
3	2022-03-03	1987-03-17	34.9611	18-39	Urban	Self-employed	Primary education	Primary	Single	2000	< 2400	No	Don't know about it	No	No	Not applicable	No	Yes	No	2+	More than two	Yes-Syphilis	Yes	4	Multigravida	3	Two-three	Health Center	Health facility	No	First trimester	800	≥500	Clinical stage-1	11	<50	TLD	First-line regimen	180	>12	Negative	11.4	>10	<1	<1	Positive	2022-04-26
4	2022-03-04	1993-06-24	28.6944	18-39	Rural	Employed	Primary education	Primary	Married	5000	2400 -12000	No	Don't know about it	No	No	Not applicable	No	Yes	No	2	Two	No	No	2	Multigravida	2	Two-three	Health Center	Health facility	Yes	First trimester	231	200-499	Clinical stage-1	Target Not Detected	<50	TLD	First-line regimen	14	>12	Negative	<1	<1	<1	<1	Negative	2022-04-26
5	2022-03-09	1982-07-15	39.65	40-59	Urban	Unemployed	Primary education	Primary	Married	1000	< 2400	No	I don't want it	No	No	Not applicable	No	Yes	No	1	One	No	No	4+	Grand multigravida	4	Four or more	Health Center	Health facility	No	First trimester	1200	≥500	Clinical stage-1	11	<50	TLD	First-line regimen	84	>12	Negative	<1	<1	<1	<1	Negative	2022-04-26
6	2022-03-14	1985-10-12	36.4222	18-39	Urban	Self-employed	Primary education	Primary	Married	2000	< 2400	No	Don't know the place where it is given	No	Yes	Hospital	No	No	No	1	One	No	No	4	Multigravida	2	Two-three	Health Center	Health facility	Yes	First trimester	712	≥500	Clinical stage-2	Target Not Detected	<50	TLD	First-line regimen	24	>12	Negative	<1	<1	<1	<1	Negative	2022-04-26
7	2022-03-14	1976-10-09	45.4306	40-59	Rural	Self-employed	Didn't attend school	Non-formal	Married	1000	< 2400	No	Don't know about it	Yes	No	Not applicable	No	No	No	2	Two	No	No	4+	Grand multigravida	4	Four or more	Health Center	Health facility	Yes	First trimester	671	≥500	Clinical stage-2	Target Not Detected	<50	TLD	First-line regimen	42	>12	Negative	<1	<1	<1	<1	Negative	2022-04-26
8	2022-03-14	1988-07-15	33.6639	18-39	Rural	Self-employed	Primary education	Primary	Single	8000	2400 -12000	No	Don't know the place where it is given	No	No	Not applicable	Yes	No	No	1	One	No	No	3	Multigravida	3	Two-three	Health Center	Health facility	No	Second trimester	740	≥500	Clinical stage-1	Target Not Detected	<50	TLD	First-line regimen	60	>12	Negative	8.45	6-10	1.26	1-1000	Positive	2022-04-26
9	2022-03-14	1983-05-23	38.8083	18-39	Rural	Self-employed	Didn't attend school	Non-formal	Cohabiting	8000	2400 -12000	No	Don't know about it	No	No	Not applicable	Yes	No	No	2+	More than two	Yes-Gonorrhea	Yes	2	Multigravida	1	One	Health Center	Health facility	No	First trimester	412	200-499	Clinical stage-3	27	<50	TLD	First-line regimen	118	>12	Negative	<1	<1	<1	<1	Negative	2022-04-26
10	2022-03-14	1983-05-23	38.8083	18-39	Rural	Self-employed	Didn't attend school	Non-formal	Cohabiting	8000	2400 -12000	No	Don't know about it	No	No	Not applicable	Yes	No	No	2+	More than two	Yes-Gonorrhea	Yes	2	Multigravida	1	One	Health Center	Health facility	No	First trimester	412	200-499	Clinical stage-3	27	<50	TLD	First-line regimen	118	>12	Negative	<1	<1	<1	<1	Negative	2022-04-26
11	2022-03-15	1986-07-15	35.6667	18-39	Rural	Unemployed	Primary education	Primary	Married	1000	< 2400	No	Don't know about it	No	No	Not applicable	No	No	No	1	One	No	No	3	Multigravida	2	Two-three	Health Center	Health facility	No	Second trimester	436	200-499	Clinical stage-3	4000	≥1000	TLD	First-line regimen	37	>12	Negative	<1	<1	2.57	1-1000	Negative	2022-04-26
12	2022-03-15	1981-02-15	41.0833	40-59	Urban	Unemployed	Primary education	Primary	Cohabiting	5000	2400 -12000	No	Don't know the place where it is given	No	No	Not applicable	No	Yes	No	2	Two	No	No	4	Multigravida	4	Four or more	Health Center	Health facility	No	First trimester	1160	≥500	Clinical stage-1	Target Not Detected	<50	TLD	First-line regimen	49	>12	Negative	<1	<1	<1	<1	Negative	2022-04-26
13	2022-03-15	1982-02-11	40.0944	40-59	Urban	Unemployed	Primary education	Primary	Married	5000	2400 -12000	No	Don't know the place where it is given	No	No	Not applicable	Yes	No	No	1	One	No	No	4+	Grand multigravida	4+	Four or more	Health Center	Health facility	No	First trimester	820	≥500	Clinical stage-2	44	<50	TLD	First-line regimen	37	>12	Negative	<1	<1	<1	<1	Negative	2022-04-26
14	2022-03-15	2000-06-26	21.7194	18-39	Urban	Self-employed	Primary education	Primary	Married	5000	2400 -12000	No	Don't know the place where it is given	No	No	Not applicable	No	No	Yes	1	One	No	No	2	Multigravida	1	One	Dispensary	Health facility	No	First trimester	416	200-499	Clinical stage-1	Target Not Detected	<50	TLD	First-line regimen	29	>12	Negative	<1	<1	<1	<1	Negative	2022-04-26
15	2022-03-15	1984-07-15	37.6667	18-39	Urban	Unemployed	Primary education	Primary	Married	1000	< 2400	No	Don't know the place where it is given	No	No	Not applicable	No	No	No	1	One	No	No	3	Multigravida	3	Two-three	Health Center	Health facility	No	First trimester	320	200-499	Clinical stage-1	40	<50	TLD	First-line regimen	14	>12	Negative	<1	<1	<1	<1	Negative	2022-04-26
16	2022-03-15	2003-10-30	18.375	18-39	Urban	Self-employed	Ordinary level	Secondary	Single	5000	2400 -12000	No	Don't know the place where it is given	No	No	Not applicable	No	Yes	No	1	One	No	No	2	Multigravida	2	Two-three	Health Center	Health facility	No	First trimester	400	200-499	Clinical stage-1	Target Not Detected	<50	TLD	First-line regimen	4	<6	Negative	<1	<1	<1	<1	Negative	2022-04-26
17	2022-03-15	1989-12-12	32.2583	18-39	Rural	Self-employed	Primary education	Primary	Cohabiting	2000	< 2400	No	Don't know about it	No	No	Not applicable	No	Yes	No	2	Two	No	No	3	Multigravida	2	Two-three	Health Center	Health facility	Yes	First trimester	546	≥500	Clinical stage-1	Target Not Detected	<50	TLD	First-line regimen	110	>12	Negative	<1	<1	<1	<1	Negative	2022-04-26
18	2022-03-15	1992-10-20	29.4028	18-39	Rural	Unemployed	Primary education	Primary	Cohabiting	2000	< 2400	No	Don't know the place where it is given	No	No	Not applicable	Yes	No	No	2+	More than two	Yes-Syphilis	Yes	2	Multigravida	1	One	Regional Referral Hospital	Health facility	Yes	First trimester	89	<200	Clinical stage-1	Target Not Detected	<50	TLD	First-line regimen	48	>12	Negative	<1	<1	<1	<1	Negative	2022-04-26
19	2022-03-15	1992-06-22	29.7306	18-39	Rural	Self-employed	Primary education	Primary	Divorced	5000	2400 -12000	No	Don't know about it	Yes	No	Not applicable	No	No	Yes	1	One	No	No	2	Multigravida	1	One	Health Center	Health facility	Yes	First trimester	315	200-499	Clinical stage-2	Target Not Detected	<50	TLD	First-line regimen	120	>12	Negative	<1	<1	<1	<1	Negative	2022-04-26
20	2022-03-15	1990-09-18	31.4917	18-39	Rural	Employed	Ordinary level	Secondary	Married	5000	2400 -12000	No	Don't know about it	Yes	No	Not applicable	No	Yes	No	1	One	No	No	2	Multigravida	1	One	Health Center	Health facility	No	First trimester	145	<200	Clinical stage-1	Target Not Detected	<50	TLD	First-line regimen	16	>12	Negative	<1	<1	<1	<1	Negative	2022-04-26
21	2022-03-15	1983-10-08	38.4361	18-39	Rural	Unemployed	Primary education	Primary	Divorced	1000	< 2400	No	Don't know about it	Yes	No	Not applicable	No	Yes	No	2	Two	No	No	4	Multigravida	3	Two-three	Home	Home	No	First trimester	203	200-499	Clinical stage-1	Target Not Detected	<50	TLD	First-line regimen	9	6-12	Negative	<1	<1	<1	<1	Negative	2022-04-26
22	2022-03-15	1975-05-20	46.8194	40-59	Rural	Self-employed	Primary education	Primary	Married	2000	< 2400	No	Don't know about it	No	No	Not applicable	No	Yes	No	1	One	No	No	3	Multigravida	2	Two-three	Health Center	Health facility	No	First trimester	107	<200	Clinical stage-1	Target Not Detected	<50	TLD	First-line regimen	16	>12	Negative	<1	<1	<1	<1	Negative	2022-04-26
23	2022-03-15	1994-10-10	27.4306	18-39	Rural	Unemployed	Primary education	Primary	Single	1000	< 2400	No	Don't know about it	No	No	Not applicable	No	No	No	1	One	No	No	3	Multigravida	2	Two-three	Health Center	Health facility	No	First trimester	39	<200	Clinical stage-1	Target Not Detected	<50	TLD	First-line regimen	90	>12	Negative	<1	<1	<1	<1	Negative	2022-04-26
24	2022-03-16	2002-03-16	20	18-39	Urban	Self-employed	Ordinary level	Secondary	Single	2000	< 2400	No	Don't know about it	No	No	Not applicable	No	Yes	No	1	One	Yes-Syphilis	Yes	1	Primigravida	1	One	Health Center	Health facility	Yes	Second trimester	380	200-499	Clinical stage-2	Target Not Detected	<50	TLD	First-line regimen	13	>12	Negative	15.19	>10	3238.81	>1000	Positive	2022-04-26
25	2022-03-16	1998-04-15	23.9194	18-39	Urban	Unemployed	Primary education	Primary	Married	2000	< 2400	No	Don't know about it	No	No	Not applicable	No	No	No	1	One	No	No	2	Multigravida	1	One	Health Center	Health facility	No	First trimester	615	≥500	Clinical stage-1	Target Not Detected	<50	TLD	First-line regimen	48	>12	Negative	<1	<1	<1	<1	Negative	2022-04-26
26	2022-03-16	1986-09-11	35.5139	18-39	Urban	Self-employed	Primary education	Primary	Married	2000	< 2400	No	Don't know the place where it is given	No	Yes	Hospital	No	No	No	1	One	No	No	3	Multigravida	2	Two-three	Health Center	Health facility	Yes	First trimester	981	≥500	Clinical stage-2	Target Not Detected	<50	TLD	First-line regimen	24	>12	Negative	<1	<1	<1	<1	Negative	2022-04-26
27	2022-03-17	1982-07-10	39.6861	40-59	Rural	Self-employed	Primary education	Primary	Divorced	6000	2400 -12000	No	Don't know about it	No	No	Not applicable	Yes	Yes	No	1	One	No	No	4+	Grand multigravida	4+	Four or more	Health Center	Health facility	No	First trimester	451	200-499	Clinical stage-2	Target Not Detected	<50	TLD	First-line regimen	72	>12	Negative	<1	<1	<1	<1	Negative	2022-04-26
28	2022-03-17	1983-06-18	38.7472	18-39	Rural	Self-employed	Primary education	Primary	Married	1000	< 2400	No	Don't know about it	No	No	Not applicable	No	Yes	No	1	One	No	No	4	Multigravida	4	Four or more	Health Center	Health facility	No	First trimester	634	≥500	Clinical stage-1	Target Not Detected	<50	TLD	First-line regimen	84	>12	Negative	<1	<1	<1	<1	Negative	2022-04-26
29	2022-03-17	2001-01-09	21.1889	40-59	Urban	Unemployed	Primary education	Primary	Cohabiting	1000	< 2400	No	Don't know about it	No	No	Not applicable	No	Yes	No	2	Two	No	No	2	Multigravida	1	One	Health Center	Health facility	No	First trimester	460	200-499	Clinical stage-1	Target Not Detected	<50	TLD	First-line regimen	46	>12	Negative	<1	<1	<1	<1	Negative	2022-04-26
30	2022-03-17	1987-07-01	34.7111	40-59	Urban	Unemployed	Primary education	Primary	Cohabiting	2000	< 2400	No	Don't know about it	No	No	Not applicable	No	Yes	No	1	One	No	No	3	Multigravida	2	Two-three	Health Center	Health facility	No	Second trimester	630	≥500	Clinical stage-1	Target Not Detected	<50	TLD	First-line regimen	29	>12	Negative	19.08	>10	2321.83	>1000	Positive	2022-04-26
31	2022-03-17	1994-10-05	27.45	40-59	Urban	Self-employed	Primary education	Primary	Married	2000	< 2400	No	Don't know about it	No	No	Not applicable	No	No	No	2+	More than two	No	No	2	Multigravida	2	Two-three	Health Center	Health facility	Yes	Second trimester	600	≥500	Clinical stage-1	Target Not Detected	<50	TLD	First-line regimen	40	>12	Negative	<1	<1	4.53	1-1000	Negative	2022-04-26
32	2022-03-17	1990-02-14	32.0917	40-59	Urban	Unemployed	Primary education	Primary	Married	2000	< 2400	No	Don't know about it	No	No	Not applicable	No	No	No	1	One	No	No	3	Multigravida	3	Two-three	Health Center	Health facility	No	Second trimester	450	200-499	Clinical stage-1	20	<50	TLD	First-line regimen	39	>12	Negative	<1	<1	6608.41	>1000	Negative	2022-04-26
33	2022-03-17	1980-08-23	41.5667	40-59	Urban	Self-employed	Primary education	Primary	Married	1000	< 2400	No	Don't know about it	No	No	Not applicable	No	Yes	No	2+	More than two	Yes-Syphilis	Yes	4	Multigravida	3	Two-three	Home	Home	Yes	First trimester	320	200-499	Clinical stage-1	Target Not Detected	<50	TLD	First-line regimen	120	>12	Negative	<1	<1	<1	<1	Negative	2022-04-26
34	2022-03-18	1999-07-15	22.675	40-59	Rural	Self-employed	Primary education	Primary	Divorced	15000	>13000	No	Don't know about it	No	Yes	Hospital	No	No	No	2	Two	No	No	2	Multigravida	2	Two-three	Health Center	Health facility	No	Second trimester	431	200-499	Clinical stage-1	Target Not Detected	<50	TLD	First-line regimen	92	>12	Negative	<1	<1	13.17	1-1000	Negative	2022-04-26
35	2022-03-18	1985-08-01	36.6306	40-59	Urban	Unemployed	Primary education	Primary	Divorced	1000	< 2400	No	Don't know about it	No	No	Not applicable	No	Yes	No	2+	More than two	No	No	3	Multigravida	3	Two-three	Health Center	Health facility	No	Second trimester	400	200-499	Clinical stage-1	Target Not Detected	<50	TLD	First-line regimen	160	>12	Negative	<1	<1	3712.81	>1000	Negative	2022-04-26
36	2022-03-18	1992-03-30	29.9667	40-59	Urban	Unemployed	Ordinary level	Secondary	Single	1000	< 2400	No	Don't know about it	No	No	Not applicable	No	Yes	No	2+	More than two	No	No	2	Multigravida	2	Two-three	Health Center	Health facility	No	Second trimester	320	200-499	Clinical stage-1	1200	≥1000	TLD	First-line regimen	8	6-12	Positive	3.37	1-5	8232.38	>1000	Positive	2022-04-26
37	2022-03-18	1995-02-14	27.0944	40-59	Urban	Self-employed	Ordinary level	Secondary	Single	1000	< 2400	No	Don't know about it	No	No	Not applicable	Yes	No	No	2+	More than two	No	No	2	Multigravida	2	Two-three	Health Center	Health facility	Yes	First trimester	620	≥500	Clinical stage-1	Target Not Detected	<50	TLD	First-line regimen	52	>12	Negative	<1	<1	<1	<1	Negative	2022-04-26
38	2022-03-18	1984-07-01	37.7139	40-59	Urban	Self-employed	Didn't attend school	Non-formal	Single	1000	< 2400	No	Don't know about it	No	No	Not applicable	No	No	No	1	One	No	No	4	Multigravida	3	Two-three	Health Center	Health facility	No	First trimester	400	200-499	Clinical stage-1	20	<50	TLD	First-line regimen	56	>12	Negative	<1	<1	<1	<1	Negative	2022-04-26
39	2022-03-21	2001-06-25	20.7389	40-59	Urban	Self-employed	Ordinary level	Secondary	Single	1000	< 2400	No	Don't know about it	No	No	Not applicable	No	Yes	No	2+	More than two	Yes	Yes	1	Primigravida	1	One	Health Center	Health facility	No	First trimester	201	200-499	Clinical stage-1	11	<50	TLD	First-line regimen	59	>12	Negative	<1	<1	<1	<1	Negative	2022-04-26
40	2022-03-21	1990-07-01	31.7222	40-59	Urban	Unemployed	Primary education	Primary	Single	1000	< 2400	No	Don't know the place where it is given	No	No	Not applicable	No	Yes	No	2	Two	No	No	3	Multigravida	2	Two-three	Health Center	Health facility	Yes	First trimester	350	200-499	Clinical stage-1	Target Not Detected	<50	TLD	First-line regimen	118	>12	Negative	<1	<1	<1	<1	Negative	2022-04-26
41	2022-03-21	2000-07-16	21.6806	40-59	Urban	Unemployed	Primary education	Primary	Cohabiting	1000	< 2400	No	Don't know about it	No	No	Not applicable	No	No	No	2	Two	No	No	2	Multigravida	2	Two-three	Health Center	Health facility	No	First trimester	640	≥500	Clinical stage-1	Target Not Detected	<50	TLD	First-line regimen	84	>12	Negative	<1	<1	<1	<1	Negative	2022-04-26
42	2022-03-21	1998-07-26	23.6528	40-59	Urban	Unemployed	Ordinary level	Secondary	Single	1000	< 2400	No	Don't know about it	No	No	Not applicable	No	No	No	1	One	No	No	1	Primigravida	1	One	Health Center	Health facility	No	First trimester	740	≥500	Clinical stage-1	Target Not Detected	<50	TLD	First-line regimen	70	>12	Negative	<1	<1	<1	<1	Negative	2022-04-26
43	2022-03-21	1991-07-15	30.6833	40-59	Urban	Self-employed	Primary education	Primary	Single	1000	< 2400	No	Don't know about it	No	No	Not applicable	No	No	No	2+	More than two	No	No	2	Multigravida	2	Two-three	Health Center	Health facility	No	First trimester	600	≥500	Clinical stage-1	Target Not Detected	<50	TLD	First-line regimen	42	>12	Negative	<1	<1	<1	<1	Negative	2022-04-26
44	2022-03-21	1995-07-13	26.6889	40-59	Rural	Unemployed	Primary education	Primary	Single	1000	< 2400	No	Don't know the place where it is given	No	No	Not applicable	No	Yes	No	2	Two	No	No	2	Multigravida	3	Two-three	Regional Designated Hospital	Health facility	No	First trimester	200	200-499	Clinical stage-1	Target Not Detected	<50	TLD	First-line regimen	8	6-12	Negative	<1	<1	<1	<1	Negative	2022-04-26
45	2022-03-22	1983-02-28	39.0611	18-39	Urban	Self-employed	Primary education	Primary	Married	5000	2400 -12000	No	Don't know about it	No	Yes	Hospital	Yes	Yes	No	2+	More than two	No	No	1	Primigravida	1	One	Health Center	Health facility	No	First trimester	Missing	Missing	Clinical stage-1	Target Not Detected	<50	TLD	First-line regimen	35	>12	Negative	<1	<1	<1	<1	Negative	2022-04-26
46	2022-03-22	1979-08-25	42.575	40-59	Urban	Self-employed	Primary education	Primary	Divorced	2000	< 2400	No	Don't know about it	No	No	Not applicable	No	Yes	No	1	One	No	No	3	Multigravida	2	Two-three	Health Center	Health facility	No	Second trimester	Missing	Missing	Clinical stage-2	Target Not Detected	<50	TLD	First-line regimen	52	>12	Negative	1.84	1-5	2883.69	>1000	Positive	2022-04-26
47	2022-03-22	1996-12-28	25.2333	40-59	Urban	Unemployed	Primary education	Primary	Married	5000	2400 -12000	No	Don't know the place where it is given	No	No	Not applicable	No	No	No	1	One	No	No	2	Multigravida	1	One	Health Center	Health facility	No	Second trimester	Missing	Missing	Clinical stage-1	Target Not Detected	<50	TLD	First-line regimen	13	>12	Negative	19.51	>10	5724	>1000	Positive	2022-04-26
48	2022-03-22	1991-06-16	30.7667	40-59	Rural	Self-employed	Ordinary level	Secondary	Cohabiting	2000	< 2400	No	Expensive	No	No	Not applicable	No	Yes	No	1	One	No	No	2	Multigravida	2	Two-three	Health Center	Health facility	No	First trimester	367	200-499	Clinical stage-1	Target Not Detected	<50	TLD	First-line regimen	7	6-12	Negative	<1	<1	<1	<1	Negative	2022-04-26
49	2022-03-23	1989-09-01	32.5611	40-59	Urban	Employed	Ordinary level	Secondary	Married	400000	>13000	No	Don't know the place where it is given	No	No	Not applicable	No	No	No	1	One	No	No	3	Multigravida	2	Two-three	Health Center	Health facility	No	First trimester	420	200-499	Clinical stage-1	Target Not Detected	<50	TLD	First-line regimen	48	>12	Negative	<1	<1	<1	<1	Negative	2022-04-26
50	2022-03-23	1991-10-06	30.4639	40-59	Urban	Unemployed	Primary education	Primary	Single	1000	< 2400	No	Don't know about it	No	No	Not applicable	No	No	No	1	One	Yes-Syphilis	Yes	2	Multigravida	1	One	Regional Designated Hospital	Health facility	No	First trimester	792	≥500	Clinical stage-1	Target Not Detected	<50	TLD	First-line regimen	36	>12	Negative	<1	<1	<1	<1	Negative	2022-04-26
51	2022-03-23	1989-06-15	32.7722	40-59	Urban	Unemployed	Primary education	Primary	Married	1000	< 2400	No	Don't know about it	No	No	Not applicable	No	Yes	Yes	1	One	No	No	3	Multigravida	2	Two-three	Health Center	Health facility	No	First trimester	650	≥500	Clinical stage-1	Target Not Detected	<50	TLD	First-line regimen	24	>12	Negative	<1	<1	<1	<1	Negative	2022-04-26
52	2022-03-23	1993-07-15	28.6889	40-59	Urban	Unemployed	Primary education	Primary	Single	1000	< 2400	No	Don't know about it	No	No	Not applicable	No	No	No	1	One	No	No	2	Multigravida	1	One	Regional Designated Hospital	Health facility	Yes	First trimester	781	≥500	Clinical stage-1	Target Not Detected	<50	TLD	First-line regimen	48	>12	Negative	<1	<1	<1	<1	Negative	2022-04-26
53	2022-03-23	1977-07-07	44.7111	40-59	Urban	Self-employed	Primary education	Primary	Single	2000	< 2400	No	Don't know about it	No	No	Not applicable	No	No	No	1	One	No	No	4	Multigravida	3	Two-three	Regional Designated Hospital	Health facility	No	First trimester	476	200-499	Clinical stage-1	Target Not Detected	<50	TLD	First-line regimen	48	>12	Negative	<1	<1	<1	<1	Negative	2022-04-26
54	2022-03-23	1983-07-01	38.7278	18-39	Urban	Unemployed	Primary education	Primary	Married	1000	< 2400	No	Don't know about it	No	No	Not applicable	No	No	No	1	One	No	No	2	Multigravida	1	One	Health Center	Health facility	No	First trimester	846	≥500	Clinical stage-1	Target Not Detected	<50	TLD	First-line regimen	36	>12	Negative	<1	<1	<1	<1	Negative	2022-04-26
55	2022-03-23	2004-04-17	17.9333	40-59	Urban	Unemployed	Ordinary level	Secondary	Single	1000	< 2400	No	Don't know about it	No	No	Not applicable	No	No	No	1	One	No	No	1	Primigravida	1	One	Health Center	Health facility	No	First trimester	683	≥500	Clinical stage-1	Target Not Detected	<50	TLD	First-line regimen	36	>12	Negative	<1	<1	<1	<1	Negative	2022-04-26
56	2022-03-23	1988-10-09	33.4556	40-59	Urban	Self-employed	Certificate	College	Single	10000	2400 -12000	No	Don't know about it	No	No	Not applicable	Yes	No	No	1	One	No	No	2	Multigravida	1	One	Regional Designated Hospital	Health facility	No	First trimester	946	≥500	Clinical stage-2	Target Not Detected	<50	TLD	First-line regimen	24	>12	Negative	<1	<1	<1	<1	Negative	2022-04-26
57	2022-03-23	1983-07-15	38.6889	18-39	Urban	Unemployed	Primary education	Primary	Divorced	1000	< 2400	No	Don't know about it	No	Yes	Hospital	No	No	No	1	One	No	No	3	Multigravida	2	Two-three	Regional Designated Hospital	Health facility	No	Second trimester	485	200-499	Clinical stage-2	Target Not Detected	<50	TLD	First-line regimen	60	>12	Positive	4.29	1-5	3959.81	>1000	Positive	2022-04-26
58	2022-03-23	1989-09-29	32.4833	40-59	Urban	Self-employed	Ordinary level	Secondary	Single	300000	>13000	No	Don't know the place where it is given	No	No	Not applicable	Yes	Yes	No	1	One	No	No	1	Primigravida	1	One	Health Center	Health facility	No	First trimester	600	≥500	Clinical stage-1	Target Not Detected	<50	TLD	First-line regimen	24	>12	Negative	<1	<1	<1	<1	Negative	2022-04-26
59	2022-03-23	1986-07-15	35.6889	40-59	Urban	Self-employed	Ordinary level	Secondary	Married	6000	2400 -12000	No	Don't know about it	No	Yes	Hospital	No	No	No	1	One	No	No	3	Multigravida	2	Two-three	Regional Designated Hospital	Health facility	No	First trimester	384	200-499	Clinical stage-1	Target Not Detected	<50	TLD	First-line regimen	168	>12	Negative	10.5	>10	<1	<1	Positive	2022-04-26
60	2022-03-23	1984-09-23	37.5	40-59	Urban	Unemployed	Primary education	Primary	Married	1000	< 2400	No	Don't know the place where it is given	Yes	No	Not applicable	No	Yes	No	1	One	Yes-Syphilis	Yes	3	Multigravida	2	Two-three	Regional Designated Hospital	Health facility	Yes	First trimester	465	200-499	Clinical stage-1	Target Not Detected	<50	TLD	First-line regimen	48	>12	Negative	<1	<1	<1	<1	Negative	2022-04-26
61	2022-03-23	1976-07-15	45.6889	40-59	Urban	Self-employed	Primary education	Primary	Divorced	2000	< 2400	No	Don't know about it	No	No	Not applicable	No	No	No	1	One	No	No	4+	Grand multigravida	3	Two-three	Health Center	Health facility	No	First trimester	340	200-499	Clinical stage-2	Target Not Detected	<50	TLD	First-line regimen	168	>12	Negative	<1	<1	<1	<1	Negative	2022-04-26
62	2022-03-23	1984-07-15	37.6889	40-59	Urban	Unemployed	Didn't attend school	Non-formal	Cohabiting	5000	2400 -12000	No	Don't know about it	No	No	Not applicable	No	No	No	2	Two	No	No	4+	Grand multigravida	4+	Four or more	Health Center	Health facility	Yes	First trimester	341	200-499	Clinical stage-1	20	<50	TLD	First-line regimen	137	>12	Negative	<1	<1	<1	<1	Negative	2022-04-26
63	2022-03-23	1985-04-30	36.8972	40-59	Urban	Unemployed	Primary education	Primary	Single	5000	2400 -12000	No	Don't know the place where it is given	No	No	Not applicable	No	No	No	2	Two	No	No	4+	Grand multigravida	4	Four or more	Health Center	Health facility	No	First trimester	Missing	Missing	Clinical stage-1	20	<50	TLD	First-line regimen	24	>12	Negative	<1	<1	<1	<1	Negative	2022-04-26
64	2022-03-23	1999-01-25	23.1611	40-59	Rural	Self-employed	Primary education	Primary	Single	1500	< 2400	No	Don't know about it	No	No	Not applicable	No	Yes	No	1	One	No	No	1	Primigravida	1	One	Health Center	Health facility	No	First trimester	470	200-499	Clinical stage-1	28	<50	TLD	First-line regimen	26	>12	Negative	<1	<1	<1	<1	Negative	2022-04-26
65	2022-03-23	2001-07-15	20.6889	40-59	Rural	Self-employed	Didn't attend school	Non-formal	Single	2000	< 2400	No	Don't know about it	No	No	Not applicable	No	No	No	2	Two	No	No	2	Multigravida	2	Two-three	Home	Home	No	First trimester	425	200-499	Clinical stage-1	44	<50	TLD	First-line regimen	96	>12	Negative	<1	<1	<1	<1	Negative	2022-04-26
66	2022-03-24	1990-07-01	31.7306	40-59	Urban	Self-employed	Primary education	Primary	Divorced	5000	2400 -12000	No	Don't know about it	No	No	Not applicable	No	No	No	2+	More than two	No	No	4	Multigravida	4	Four or more	Health Center	Health facility	No	Second trimester	Missing	Missing	Clinical stage-2	Missing	Missing	TLD	First-line regimen	16	>12	Positive	4.17	1-5	4803.93	>1000	Positive	2022-04-26
67	2022-03-24	2001-07-15	20.6917	40-59	Urban	Unemployed	Primary education	Primary	Divorced	5000	2400 -12000	No	Don't know about it	No	No	Not applicable	Yes	Yes	No	2+	More than two	No	No	1	Primigravida	1	One	Health Center	Health facility	No	First trimester	Missing	Missing	Clinical stage-1	Target Not Detected	<50	TLD	First-line regimen	113	>12	Negative	<1	<1	<1	<1	Negative	2022-04-26
68	2022-03-24	1988-10-03	33.475	40-59	Urban	Unemployed	Didn't attend school	Non-formal	Married	5000	2400 -12000	No	Don't know the place where it is given	No	Yes	Hospital	Yes	No	No	2+	More than two	No	No	3	Multigravida	3	Two-three	Health Center	Health facility	No	First trimester	Missing	Missing	Clinical stage-1	Target Not Detected	<50	TLD	First-line regimen	19	>12	Negative	<1	<1	<1	<1	Negative	2022-04-26
69	2022-03-24	1990-01-07	32.2139	40-59	Urban	Employed	Ordinary level	Secondary	Married	10000	2400 -12000	No	Don't know the place where it is given	No	No	Not applicable	No	Yes	No	1	One	No	No	2	Multigravida	2	Two-three	Health Center	Health facility	No	First trimester	365	200-499	Clinical stage-1	Target Not Detected	<50	TLD	First-line regimen	108	>12	Negative	<1	<1	<1	<1	Negative	2022-04-26
70	2022-03-24	1986-01-03	36.225	40-59	Urban	Self-employed	Primary education	Primary	Married	5000	2400 -12000	No	Don't know about it	No	No	Not applicable	No	Yes	No	1	One	No	No	3	Multigravida	3	Two-three	Health Center	Health facility	No	First trimester	Missing	Missing	Clinical stage-1	20	<50	TLD	First-line regimen	28	>12	Negative	<1	<1	<1	<1	Negative	2022-04-26
71	2022-03-24	2002-03-28	19.9889	40-59	Urban	Unemployed	Primary education	Primary	Cohabiting	5000	2400 -12000	No	Don't know about it	No	No	Not applicable	No	No	No	2+	More than two	No	No	1	Primigravida	1	One	Health Center	Health facility	No	First trimester	540	≥500	Clinical stage-1	Target Not Detected	<50	TLD	First-line regimen	2	<6	Negative	<1	<1	<1	<1	Negative	2022-04-26
72	2022-03-24	1991-02-02	31.1444	40-59	Urban	Unemployed	Primary education	Primary	Married	5000	2400 -12000	No	Don't know about it	No	No	Not applicable	No	No	No	2+	More than two	No	No	3	Multigravida	2	Two-three	Health Center	Health facility	No	First trimester	Missing	Missing	Clinical stage-1	Target Not Detected	<50	TLD	First-line regimen	48	>12	Negative	<1	<1	<1	<1	Negative	2022-04-26
73	2022-03-24	1991-08-01	30.6472	40-59	Urban	Unemployed	Primary education	Primary	Single	2000	< 2400	No	Don't know the place where it is given	No	Yes	Hospital	No	No	No	1	One	No	No	3	Multigravida	2	Two-three	Health Center	Health facility	No	First trimester	640	≥500	Clinical stage-1	Target Not Detected	<50	TLD	First-line regimen	10	6-12	Negative	<1	<1	<1	<1	Negative	2022-04-26
74	2022-03-24	1990-07-01	31.7306	40-59	Rural	Unemployed	Primary education	Primary	Married	500	< 2400	No	Don't know about it	Yes	Yes	Hospital	No	No	No	1	One	No	No	3	Multigravida	3	Two-three	Health Center	Health facility	No	Second trimester	320	200-499	Clinical stage-1	1966	≥1000	TLD	First-line regimen	128	>12	Negative	<1	<1	7066.07	>1000	Negative	2022-04-26
75	2022-03-24	1995-10-13	26.4472	40-59	Rural	Self-employed	Ordinary level	Secondary	Cohabiting	1000	< 2400	No	Don't know about it	No	Yes	Hospital	No	No	No	1	One	No	No	1	Primigravida	1	One	Dispensary	Health facility	No	First trimester	546	≥500	Clinical stage-1	Target Not Detected	<50	TLD	First-line regimen	11	6-12	Positive	5.43	1-5	<1	<1	Positive	2022-04-26
76	2022-03-25	2002-05-01	19.9	40-59	Urban	Self-employed	Primary education	Primary	Married	5000	2400 -12000	No	Don't know about it	No	Yes	Hospital	No	No	No	2+	More than two	No	No	1	Primigravida	1	One	Health Center	Health facility	No	First trimester	Missing	Missing	Clinical stage-1	Target Not Detected	<50	TLD	First-line regimen	7	6-12	Negative	<1	<1	<1	<1	Negative	2022-04-26
77	2022-03-25	1997-02-05	25.1389	40-59	Urban	Unemployed	Ordinary level	Secondary	Married	5000	2400 -12000	No	Don't know the place where it is given	No	No	Not applicable	No	No	Yes	1	One	No	No	1	Primigravida	1	One	Health Center	Health facility	No	First trimester	Missing	Missing	Clinical stage-1	Target Not Detected	<50	TLD	First-line regimen	12	6-12	Negative	<1	<1	<1	<1	Negative	2022-04-26
78	2022-03-25	1995-07-15	26.6944	40-59	Urban	Self-employed	Primary education	Primary	Married	5000	2400 -12000	No	Don't know about it	No	No	Not applicable	No	No	No	2+	More than two	No	No	3	Multigravida	3	Two-three	Health Center	Health facility	No	First trimester	Missing	Missing	Clinical stage-1	11	<50	TLD	First-line regimen	78	>12	Negative	<1	<1	<1	<1	Negative	2022-04-26
79	2022-03-25	2002-11-18	19.3528	40-59	Urban	Unemployed	Primary education	Primary	Single	2000	< 2400	No	Don't know the place where it is given	No	No	Not applicable	No	No	No	1	One	No	No	1	Primigravida	1	One	Health Center	Health facility	No	First trimester	482	200-499	Clinical stage-1	Target Not Detected	<50	TLD	First-line regimen	2	<6	Negative	<1	<1	<1	<1	Negative	2022-04-26
80	2022-03-28	1979-07-15	42.7028	40-59	Urban	Self-employed	Primary education	Primary	Married	5000	2400 -12000	No	Don't know about it	No	No	Not applicable	No	Yes	No	2+	More than two	No	No	4+	Grand multigravida	4+	Four or more	Health Center	Health facility	No	First trimester	Missing	Missing	Clinical stage-1	Target Not Detected	<50	TLD	First-line regimen	59	>12	Negative	<1	<1	<1	<1	Negative	2022-04-26
81	2022-03-28	1989-07-15	32.7028	40-59	Urban	Self-employed	Primary education	Primary	Single	5000	2400 -12000	No	Don't know about it	No	Yes	Hospital	Yes	Yes	No	2+	More than two	No	No	3	Multigravida	2	Two-three	Health Center	Health facility	No	First trimester	Missing	Missing	Clinical stage-1	Target Not Detected	<50	TLD	First-line regimen	120	>12	Negative	<1	<1	<1	<1	Negative	2022-04-26
82	2022-03-28	1993-12-12	28.2944	40-59	Urban	Self-employed	Primary education	Primary	Married	5000	2400 -12000	No	Don't know about it	No	No	Not applicable	No	Yes	No	2+	More than two	No	No	4	Multigravida	3	Two-three	Health Center	Health facility	No	First trimester	Missing	Missing	Clinical stage-1	Target Not Detected	<50	TLD	First-line regimen	72	>12	Negative	<1	<1	<1	<1	Negative	2022-04-26
83	2022-03-28	1983-01-12	39.2111	18-39	Urban	Self-employed	Primary education	Primary	Married	5000	2400 -12000	No	Don't know about it	No	No	Not applicable	No	No	No	2	Two	No	No	3	Multigravida	2	Two-three	Health Center	Health facility	No	First trimester	Missing	Missing	Clinical stage-1	Target Not Detected	<50	TLD	First-line regimen	140	>12	Negative	<1	<1	<1	<1	Negative	2022-04-26
84	2022-03-28	1990-11-28	31.3333	40-59	Rural	Self-employed	Primary education	Primary	Single	5000	2400 -12000	No	Don't know about it	No	No	Not applicable	No	Yes	No	1	One	No	No	2	Multigravida	2	Two-three	Regional Referral Hospital	Health facility	No	First trimester	593	≥500	Clinical stage-1	20	<50	TLD	First-line regimen	103	>12	Negative	<1	<1	<1	<1	Negative	2022-04-26
85	2022-03-28	1984-02-28	38.0833	40-59	Rural	Self-employed	Degree	College	Married	15000	>13000	No	Don't know about it	No	No	Not applicable	No	No	No	2	Two	No	No	3	Multigravida	1	One	Regional Designated Hospital	Health facility	Yes	Second trimester	295	200-499	Clinical stage-1	45	<50	TLD	First-line regimen	12	6-12	Positive	3.13	1-5	6849.71	>1000	Positive	2022-04-26
86	2022-03-28	1976-07-15	45.7028	40-59	Rural	Self-employed	Primary education	Primary	Divorced	2000	< 2400	No	Don't know about it	Yes	Yes	Hospital	No	Yes	No	1	One	No	No	4+	Grand multigravida	4+	Four or more	Regional Referral Hospital	Health facility	No	Second trimester	280	200-499	Clinical stage-1	Target Not Detected	<50	TLD	First-line regimen	180	>12	Negative	<1	<1	<1	<1	Negative	2022-04-26
87	2022-03-28	1985-11-06	36.3944	40-59	Rural	Employed	Diploma	College	Married	5000	2400 -12000	No	Don't know about it	No	Yes	Hospital	No	No	No	1	One	No	No	3	Multigravida	2	Two-three	Health Center	Health facility	Yes	Second trimester	241	200-499	Clinical stage-1	Target Not Detected	<50	TLD	First-line regimen	11	6-12	Negative	<1	<1	<1	<1	Negative	2022-04-26
88	2022-03-28	2000-02-03	22.1528	40-59	Rural	Unemployed	Ordinary level	Secondary	Single	3000	2400 -12000	No	Don't know about it	No	No	Not applicable	No	No	No	2	Two	No	No	1	Primigravida	1	One	Health Center	Health facility	No	Second trimester	501	≥500	Clinical stage-1	Target Not Detected	<50	TLD	First-line regimen	3	<6	Negative	<1	<1	<1	<1	Negative	2022-04-26
89	2022-03-28	1990-07-30	31.6611	40-59	Rural	Unemployed	Ordinary level	Secondary	Single	2000	< 2400	No	Don't know about it	No	No	Not applicable	No	Yes	No	2	Two	No	No	2	Multigravida	2	Two-three	Health Center	Health facility	No	Second trimester	300	200-499	Clinical stage-1	20	<50	TLD	First-line regimen	69	>12	Negative	<1	<1	<1	<1	Negative	2022-04-26
90	2022-03-28	2001-06-15	20.7861	40-59	Rural	Unemployed	Primary education	Primary	Married	1000	< 2400	No	Don't know about it	No	No	Not applicable	No	No	No	1	One	No	No	1	Primigravida	1	One	Regional Designated Hospital	Health facility	No	Second trimester	560	≥500	Clinical stage-1	346	50-1000	TLD	First-line regimen	39	>12	Negative	<1	<1	6.64	1-1000	Negative	2022-04-26
91	2022-03-28	1990-07-15	31.7028	40-59	Rural	Unemployed	Primary education	Primary	Single	1000	< 2400	No	Don't know about it	No	No	Not applicable	No	No	No	1	One	No	No	3	Multigravida	3	Two-three	Regional Designated Hospital	Health facility	No	Second trimester	490	200-499	Clinical stage-1	144	50-1000	TLD	First-line regimen	60	>12	Negative	<1	<1	<1	<1	Negative	2022-04-26
92	2022-03-28	1992-07-15	29.7028	40-59	Rural	Unemployed	Primary education	Primary	Married	2000	< 2400	No	Don't know about it	No	No	Not applicable	No	No	No	1	One	No	No	3	Multigravida	3	Two-three	Regional Designated Hospital	Health facility	No	Second trimester	720	≥500	Clinical stage-1	Target Not Detected	<50	TLD	First-line regimen	60	>12	Negative	<1	<1	<1	<1	Negative	2022-04-26
93	2022-03-29	1982-10-28	39.4194	18-39	Urban	Unemployed	Primary education	Primary	Divorced	5000	2400 -12000	No	Don't know about it	No	No	Not applicable	No	Yes	Yes	1	One	No	No	4	Multigravida	3	Two-three	Health Center	Health facility	No	Second trimester	Missing	Missing	Clinical stage-1	Target Not Detected	<50	TLD	First-line regimen	103	>12	Negative	<1	<1	<1	<1	Negative	2022-04-26
94	2022-03-30	1987-07-01	34.7472	40-59	Urban	Self-employed	Primary education	Primary	Married	5000	2400 -12000	No	Don't know about it	No	No	Not applicable	No	Yes	No	2	Two	No	No	4	Multigravida	4	Four or more	Health Center	Health facility	No	Second trimester	Missing	Missing	Clinical stage-1	Target Not Detected	<50	TLD	First-line regimen	19	>12	Negative	<1	<1	<1	<1	Negative	2022-04-26
95	2022-03-30	1999-07-15	22.7083	40-59	Rural	Self-employed	Primary education	Primary	Married	2000	< 2400	No	Don't know about it	No	No	Not applicable	No	No	No	1	One	No	No	3	Multigravida	3	Two-three	Home	Home	No	Second trimester	Missing	Missing	Clinical stage-1	20	<50	TLD	First-line regimen	15	>12	Negative	<1	<1	<1	<1	Negative	2022-04-26
96	2022-03-30	1989-05-15	32.875	40-59	Rural	Self-employed	Primary education	Primary	Married	2000	< 2400	No	Don't know about it	No	No	Not applicable	No	No	No	1	One	No	No	3	Multigravida	2	Two-three	Health Center	Health facility	No	Second trimester	701	≥500	Clinical stage-1	Target Not Detected	<50	TLD	First-line regimen	15	>12	Negative	<1	<1	<1	<1	Negative	2022-04-26
97	2022-03-30	1984-07-13	37.7139	40-59	Urban	Self-employed	Primary education	Primary	Married	15000	>13000	No	Don't know about it	No	No	Not applicable	No	Yes	No	1	One	No	No	2	Multigravida	1	One	Regional Designated Hospital	Health facility	No	Second trimester	429	200-499	Clinical stage-1	Target Not Detected	<50	TLD	First-line regimen	13	>12	Negative	<1	<1	<1	<1	Negative	2022-04-26
98	2022-03-30	1995-02-12	27.1333	40-59	Urban	Employed	Ordinary level	Secondary	Married	12000	2400 -12000	No	Don't know the place where it is given	No	No	Not applicable	No	Yes	No	1	One	No	No	3	Multigravida	2	Two-three	Regional Designated Hospital	Health facility	No	Second trimester	282	200-499	Clinical stage-1	Target Not Detected	<50	TLD	First-line regimen	124	>12	Negative	<1	<1	<1	<1	Negative	2022-04-26
99	2022-03-30	1989-12-12	32.3	40-59	Urban	Unemployed	Primary education	Primary	Single	5000	2400 -12000	No	Don't know the place where it is given	No	No	Not applicable	No	No	No	1	One	No	No	2	Multigravida	1	One	Health Center	Health facility	Yes	Second trimester	Missing	Missing	Clinical stage-1	Target Not Detected	<50	TLD	First-line regimen	30	>12	Negative	<1	<1	<1	<1	Negative	2022-04-26
100	2022-03-30	1990-07-17	31.7028	40-59	Urban	Unemployed	Primary education	Primary	Divorced	5000	2400 -12000	No	Don't know about it	No	No	Not applicable	Yes	Yes	No	1	One	No	No	3	Multigravida	2	Two-three	Health Center	Health facility	No	Second trimester	484	200-499	Clinical stage-1	Target Not Detected	<50	TLD	First-line regimen	61	>12	Negative	<1	<1	<1	<1	Negative	2022-04-26
101	2022-03-30	1984-07-30	37.6667	40-59	Urban	Self-employed	Ordinary level	Secondary	Married	2000	< 2400	No	Don't know the place where it is given	No	No	Not applicable	Yes	No	No	1	One	No	No	4	Multigravida	3	Two-three	Regional Designated Hospital	Health facility	No	Second trimester	602	≥500	Clinical stage-1	40	<50	TLD	First-line regimen	115	>12	Negative	<1	<1	<1	<1	Negative	2022-04-26
102	2022-03-30	1998-03-26	24.0111	40-59	Urban	Unemployed	Ordinary level	Secondary	Single	1000	< 2400	No	Don't know about it	No	No	Not applicable	Yes	No	No	1	One	No	No	1	Primigravida	1	One	Health Center	Health facility	No	Second trimester	520	≥500	Clinical stage-1	Target Not Detected	<50	TLD	First-line regimen	40	>12	Negative	<1	<1	<1	<1	Negative	2022-04-26
103	2022-03-30	1991-07-15	30.7083	40-59	Urban	Self-employed	Ordinary level	Secondary	Single	20000	>13000	No	Don't know about it	No	No	Not applicable	No	Yes	No	1	One	No	No	1	Primigravida	1	One	Health Center	Health facility	Yes	Second trimester	384	200-499	Clinical stage-1	Target Not Detected	<50	TLD	First-line regimen	49	>12	Negative	<1	<1	<1	<1	Negative	2022-04-26
104	2022-03-31	1993-04-05	28.9889	40-59	Urban	Self-employed	Ordinary level	Secondary	Cohabiting	5000	2400 -12000	No	Don't know about it	No	No	Not applicable	No	No	No	1	One	No	No	2	Multigravida	2	Two-three	Health Center	Health facility	No	Second trimester	Missing	Missing	Clinical stage-1	Target Not Detected	<50	TLD	First-line regimen	7	6-12	Negative	<1	<1	<1	<1	Negative	2022-04-26
105	2022-03-31	1985-07-14	36.7139	40-59	Urban	Self-employed	Primary education	Primary	Single	5000	2400 -12000	No	Don't know about it	No	No	Not applicable	Yes	Yes	No	2+	More than two	No	No	3	Multigravida	3	Two-three	Health Center	Health facility	No	Second trimester	Missing	Missing	Clinical stage-1	Target Not Detected	<50	TLD	First-line regimen	33	>12	Negative	<1	<1	<1	<1	Negative	2022-04-26
106	2022-03-31	1996-03-04	26.075	40-59	Rural	Self-employed	Primary education	Primary	Cohabiting	2000	< 2400	No	Don't know about it	No	No	Not applicable	No	Yes	No	1	One	No	No	3	Multigravida	2	Two-three	Health Center	Health facility	No	Second trimester	544	≥500	Clinical stage-1	40	<50	TLD	First-line regimen	38	>12	Negative	<1	<1	<1	<1	Negative	2022-04-26
107	2022-04-01	1984-07-15	37.7111	40-59	Rural	Self-employed	Didn't attend school	Non-formal	Divorced	2000	< 2400	No	Don't know about it	No	No	Not applicable	Yes	Yes	No	2+	More than two	No	No	4	Multigravida	3	Two-three	Health Center	Health facility	No	Second trimester	365	200-499	Clinical stage-1	Target Not Detected	<50	TLD	First-line regimen	22	>12	Negative	<1	<1	<1	<1	Negative	2022-04-26
108	2022-04-01	1998-02-02	24.1639	40-59	Rural	Self-employed	Primary education	Primary	Married	1000	< 2400	No	Don't know about it	No	No	Not applicable	No	No	No	1	One	No	No	2	Multigravida	1	One	Health Center	Health facility	No	Second trimester	205	200-499	Clinical stage-1	601	50-1000	TLD	First-line regimen	8	6-12	Negative	<1	<1	<1	<1	Negative	2022-04-26
109	2022-04-01	1988-03-13	34.05	40-59	Rural	Unemployed	Primary education	Primary	Cohabiting	1000	< 2400	No	Don't know about it	No	No	Not applicable	No	No	No	2+	More than two	No	No	4	Multigravida	3	Two-three	Home	Home	No	Second trimester	261	200-499	Clinical stage-1	544	50-1000	TLD	First-line regimen	64	>12	Negative	<1	<1	<1	<1	Negative	2022-04-26
110	2022-04-01	1993-07-15	28.7111	40-59	Rural	Unemployed	Primary education	Primary	Married	1000	< 2400	No	Don't know about it	No	No	Not applicable	No	No	No	1	One	No	No	3	Multigravida	2	Two-three	Health Center	Health facility	No	Second trimester	356	200-499	Clinical stage-1	244	50-1000	TLD	First-line regimen	107	>12	Negative	<1	<1	<1	<1	Negative	2022-04-26
111	2022-04-01	1992-09-05	29.5722	40-59	Rural	Unemployed	Primary education	Primary	Divorced	1000	< 2400	No	Don't know about it	No	Yes	Hospital	Yes	No	Yes	2	Two	No	No	2	Multigravida	2	Two-three	Health Center	Health facility	No	Second trimester	201	200-499	Clinical stage-1	Target Not Detected	<50	TLD	First-line regimen	12	6-12	Negative	<1	<1	<1	<1	Negative	2022-04-26
112	2022-04-01	1990-07-15	31.7111	40-59	Rural	Unemployed	Didn't attend school	Non-formal	Cohabiting	1000	< 2400	No	Don't know about it	No	No	Not applicable	No	No	No	2	Two	No	No	4+	Grand multigravida	4	Four or more	Health Center	Health facility	No	Second trimester	497	200-499	Clinical stage-1	Target Not Detected	<50	TLD	First-line regimen	21	>12	Negative	<1	<1	<1	<1	Negative	2022-04-26
113	2022-04-01	1977-07-07	44.7333	40-59	Rural	Unemployed	Primary education	Primary	Married	1000	< 2400	No	Don't know about it	Yes	No	Not applicable	No	Yes	No	1	One	No	No	4+	Grand multigravida	4+	Four or more	Health Center	Health facility	No	Second trimester	360	200-499	Clinical stage-1	40	<50	TLD	First-line regimen	25	>12	Negative	<1	<1	<1	<1	Negative	2022-04-26
114	2022-04-01	1986-06-12	35.8028	40-59	Rural	Unemployed	Primary education	Primary	Married	1000	< 2400	No	Don't know about it	No	No	Not applicable	No	Yes	No	1	One	No	No	3	Multigravida	2	Two-three	Health Center	Health facility	No	Second trimester	256	200-499	Clinical stage-1	Target Not Detected	<50	TLD	First-line regimen	64	>12	Negative	<1	<1	<1	<1	Negative	2022-04-26
115	2022-04-01	1984-11-08	37.3972	40-59	Rural	Unemployed	Ordinary level	Secondary	Married	1000	< 2400	No	Don't know about it	No	Yes	Hospital	No	No	No	1	One	No	No	4	Multigravida	2	Two-three	Health Center	Health facility	No	Second trimester	204	200-499	Clinical stage-1	904	50-1000	TLD	First-line regimen	38	>12	Negative	<1	<1	<1	<1	Negative	2022-04-26
116	2022-04-01	2000-02-15	22.1278	40-59	Rural	Unemployed	Primary education	Primary	Married	2000	< 2400	No	Don't know about it	No	No	Not applicable	No	No	No	1	One	No	No	1	Primigravida	1	One	Health Center	Health facility	No	Second trimester	275	200-499	Clinical stage-1	Target Not Detected	<50	TLD	First-line regimen	18	>12	Negative	<1	<1	<1	<1	Negative	2022-04-26
117	2022-04-01	1979-02-02	43.1639	40-59	Rural	Self-employed	Didn't attend school	Non-formal	Married	1000	< 2400	No	Don't know about it	No	No	Not applicable	No	Yes	No	1	One	No	No	4+	Grand multigravida	4+	Four or more	Health Center	Health facility	No	Second trimester	365	200-499	Clinical stage-1	40	<50	TLD	First-line regimen	39	>12	Negative	16.84	>10	<1	<1	Positive	2022-04-26
118	2022-04-04	1996-09-21	25.5361	40-59	Urban	Self-employed	Ordinary level	Secondary	Married	5000	2400 -12000	No	Don't know about it	No	No	Not applicable	No	No	No	1	One	No	No	3	Multigravida	3	Two-three	Health Center	Health facility	No	Second trimester	Missing	Missing	Clinical stage-1	Target Not Detected	<50	TLD	First-line regimen	78	>12	Negative	<1	<1	<1	<1	Negative	2022-04-26
119	2022-04-04	1992-07-15	29.7194	40-59	Urban	Self-employed	Primary education	Primary	Married	5000	2400 -12000	No	Don't know about it	No	No	Not applicable	No	No	No	2+	More than two	No	No	3	Multigravida	2	Two-three	Health Center	Health facility	No	Second trimester	Missing	Missing	Clinical stage-1	Target Not Detected	<50	TLD	First-line regimen	52	>12	Negative	<1	<1	<1	<1	Negative	2022-04-26
120	2022-04-04	1997-10-22	24.45	40-59	Urban	Self-employed	Primary education	Primary	Married	10000	2400 -12000	No	Don't know about it	No	No	Not applicable	No	No	No	1	One	No	No	2	Multigravida	1	One	Health Center	Health facility	Yes	Second trimester	Missing	Missing	Clinical stage-1	Target Not Detected	<50	TLD	First-line regimen	14	>12	Negative	<1	<1	<1	<1	Negative	2022-04-26
121	2022-04-04	1989-10-25	32.4417	40-59	Urban	Unemployed	Primary education	Primary	Married	5000	2400 -12000	No	Don't know about it	No	No	Not applicable	No	No	No	2+	More than two	No	No	2	Multigravida	2	Two-three	Health Center	Health facility	No	Second trimester	Missing	Missing	Clinical stage-1	Target Not Detected	<50	TLD	First-line regimen	31	>12	Negative	<1	<1	<1	<1	Negative	2022-04-26
122	2022-04-04	1997-01-31	25.1778	40-59	Urban	Self-employed	Certificate	College	Single	10000	2400 -12000	No	Don't know about it	No	No	Not applicable	No	Yes	No	2	Two	No	No	2	Multigravida	1	One	Health Center	Health facility	No	Second trimester	Missing	Missing	Clinical stage-1	Target Not Detected	<50	TLD	First-line regimen	43	>12	Negative	<1	<1	<1	<1	Negative	2022-04-26
123	2022-04-04	1991-12-09	30.3194	40-59	Urban	Self-employed	Primary education	Primary	Married	5000	2400 -12000	No	Don't know about it	No	No	Not applicable	Yes	Yes	No	1	One	No	No	3	Multigravida	3	Two-three	Health Center	Health facility	No	Second trimester	Missing	Missing	Clinical stage-1	Target Not Detected	<50	TLD	First-line regimen	46	>12	Negative	<1	<1	<1	<1	Negative	2022-04-26
124	2022-04-04	1998-12-27	23.2694	40-59	Urban	Unemployed	Ordinary level	Secondary	Single	5000	2400 -12000	No	Don't know about it	No	No	Not applicable	No	Yes	No	2+	More than two	No	No	1	Primigravida	1	One	Health Center	Health facility	No	Second trimester	Missing	Missing	Clinical stage-1	Target Not Detected	<50	TLD	First-line regimen	53	>12	Negative	<1	<1	<1	<1	Negative	2022-04-26
125	2022-04-04	1999-04-07	22.9917	40-59	Urban	Self-employed	Ordinary level	Secondary	Married	5000	2400 -12000	No	Don't know about it	No	No	Not applicable	No	Yes	No	1	One	No	No	2	Multigravida	1	One	Health Center	Health facility	Yes	Second trimester	Missing	Missing	Clinical stage-1	Target Not Detected	<50	TLD	First-line regimen	192	>12	Negative	<1	<1	<1	<1	Negative	2022-04-26
126	2022-04-04	1986-10-11	35.4806	40-59	Urban	Self-employed	Primary education	Primary	Married	2000	< 2400	No	Don't know about it	No	No	Not applicable	No	Yes	No	2+	More than two	No	No	3	Multigravida	3	Two-three	Health Center	Health facility	No	Second trimester	Missing	Missing	Clinical stage-1	45	<50	TLD	First-line regimen	18	>12	Negative	<1	<1	<1	<1	Negative	2022-04-26
127	2022-04-04	1992-07-15	29.7194	40-59	Urban	Self-employed	Primary education	Primary	Married	5000	2400 -12000	No	Don't know about it	No	No	Not applicable	No	Yes	No	1	One	No	No	2	Multigravida	1	One	Health Center	Health facility	No	Second trimester	700	≥500	Clinical stage-1	23	<50	TLD	First-line regimen	57	>12	Negative	<1	<1	<1	<1	Negative	2022-04-26
128	2022-04-04	1999-02-02	23.1722	40-59	Rural	Unemployed	Primary education	Primary	Cohabiting	2000	< 2400	No	Don't know about it	No	Yes	Hospital	No	Yes	No	1	One	Yes-Gonorrhea	Yes	2	Multigravida	1	One	Health Center	Health facility	No	Second trimester	201	200-499	Clinical stage-1	509	50-1000	TLD	First-line regimen	172	>12	Negative	<1	<1	<1	<1	Negative	2022-04-26
129	2022-04-04	2000-04-02	22.0056	40-59	Rural	Unemployed	Primary education	Primary	Cohabiting	2000	< 2400	No	Don't know about it	No	No	Not applicable	No	No	No	1	One	No	No	2	Multigravida	2	Two-three	Health Center	Health facility	No	Second trimester	120	<200	Clinical stage-1	Target Not Detected	<50	TLD	First-line regimen	76	>12	Negative	<1	<1	<1	<1	Negative	2022-04-26
130	2022-04-04	1988-10-03	33.5028	40-59	Rural	Employed	Degree	College	Cohabiting	10000	2400 -12000	No	Don't know about it	Yes	No	Not applicable	No	Yes	No	1	One	No	No	3	Multigravida	1	One	Regional Designated Hospital	Health facility	No	Second trimester	102	<200	Clinical stage-1	Target Not Detected	<50	TLD	First-line regimen	58	>12	Negative	<1	<1	<1	<1	Negative	2022-04-26
131	2022-04-04	1990-07-17	31.7139	40-59	Rural	Self-employed	Ordinary level	Secondary	Cohabiting	2000	< 2400	No	Don't know about it	No	No	Not applicable	No	Yes	No	1	One	No	No	2	Multigravida	2	Two-three	Regional Designated Hospital	Health facility	Yes	Second trimester	573	≥500	Clinical stage-1	Target Not Detected	<50	TLD	First-line regimen	87	>12	Negative	<1	<1	<1	<1	Negative	2022-04-26
132	2022-04-04	1997-05-08	24.9056	40-59	Rural	Unemployed	Primary education	Primary	Cohabiting	2000	< 2400	No	Don't know about it	No	No	Not applicable	No	Yes	No	2	Two	No	No	2	Multigravida	2	Two-three	Health Center	Health facility	Yes	Second trimester	304	200-499	Clinical stage-1	40	<50	TLD	First-line regimen	2	<6	Negative	<1	<1	<1	<1	Negative	2022-04-26
133	2022-04-04	1996-12-25	25.275	40-59	Rural	Self-employed	Ordinary level	Secondary	Cohabiting	10000	2400 -12000	No	Don't know about it	No	Yes	Hospital	Yes	Yes	No	1	One	No	No	1	Primigravida	1	One	Regional Designated Hospital	Health facility	No	Second trimester	354	200-499	Clinical stage-1	20	<50	TLD	First-line regimen	25	>12	Negative	<1	<1	<1	<1	Negative	2022-04-26
134	2022-04-04	1988-07-15	33.7194	40-59	Rural	Unemployed	Primary education	Primary	Cohabiting	2000	< 2400	No	Don't know about it	No	Yes	Hospital	No	No	No	1	One	No	No	4	Multigravida	2	Two-three	Regional Designated Hospital	Health facility	No	Second trimester	243	200-499	Clinical stage-1	Target Not Detected	<50	TLD	First-line regimen	108	>12	Negative	4.08	1-5	<1	<1	Positive	2022-04-26
135	2022-04-04	1982-07-15	39.7194	40-59	Rural	Unemployed	Primary education	Primary	Married	2000	< 2400	No	Don't know about it	No	No	Not applicable	No	Yes	No	1	One	No	No	4+	Grand multigravida	4+	Four or more	Health Center	Health facility	No	Second trimester	600	≥500	Clinical stage-1	Target Not Detected	<50	TLD	First-line regimen	67	>12	Negative	<1	<1	<1	<1	Negative	2022-04-26
136	2022-04-04	1998-05-16	23.8833	40-59	Rural	Self-employed	Primary education	Primary	Divorced	2000	< 2400	No	Don't know about it	No	No	Not applicable	No	Yes	No	1	One	Yes-Syphilis	Yes	1	Primigravida	1	One	Health Center	Health facility	No	Second trimester	564	≥500	Clinical stage-1	Target Not Detected	<50	TLD	First-line regimen	18	>12	Negative	<1	<1	<1	<1	Negative	2022-04-26
137	2022-04-04	1992-07-17	29.7139	40-59	Rural	Unemployed	Primary education	Primary	Cohabiting	1000	< 2400	No	Don't know about it	No	No	Not applicable	No	No	No	2+	More than two	Yes-Syphilis	Yes	3	Multigravida	2	Two-three	Health Center	Health facility	No	Second trimester	461	200-499	Clinical stage-1	Target Not Detected	<50	TLD	First-line regimen	9	6-12	Negative	<1	<1	<1	<1	Negative	2022-04-26
138	2022-04-05	1993-12-30	28.2639	40-59	Urban	Self-employed	Primary education	Primary	Single	3000	2400 -12000	No	Don't know about it	No	No	Not applicable	No	No	No	2+	More than two	No	No	2	Multigravida	2	Two-three	Health Center	Health facility	No	Second trimester	640	≥500	Clinical stage-1	11	<50	TLD	First-line regimen	24	>12	Negative	<1	<1	<1	<1	Negative	2022-04-26
139	2022-04-05	1984-10-10	37.4861	40-59	Urban	Self-employed	Primary education	Primary	Single	2000	< 2400	No	Don't know about it	No	No	Not applicable	No	No	No	1	One	No	No	4	Multigravida	2	Two-three	Health Center	Health facility	Yes	Second trimester	Missing	Missing	Clinical stage-1	Target Not Detected	<50	TLD	First-line regimen	44	>12	Negative	<1	<1	<1	<1	Negative	2022-04-26
140	2022-04-05	1982-08-28	39.6028	40-59	Urban	Self-employed	Primary education	Primary	Married	2000	< 2400	No	Don't know about it	No	No	Not applicable	No	No	No	1	One	No	No	3	Multigravida	3	Two-three	Health Center	Health facility	No	Second trimester	Missing	Missing	Clinical stage-1	Target Not Detected	<50	TLD	First-line regimen	48	>12	Negative	<1	<1	<1	<1	Negative	2022-04-26
141	2022-04-05	2000-07-15	21.7222	40-59	Urban	Unemployed	Primary education	Primary	Married	3000	2400 -12000	No	Don't know about it	No	No	Not applicable	No	No	No	2+	More than two	No	No	3	Multigravida	2	Two-three	Health Center	Health facility	No	Second trimester	680	≥500	Clinical stage-1	Target Not Detected	<50	TLD	First-line regimen	1	<6	Negative	<1	<1	<1	<1	Negative	2022-04-26
142	2022-04-05	1980-01-15	42.2222	40-59	Urban	Self-employed	Primary education	Primary	Married	2000	< 2400	No	Don't know about it	No	No	Not applicable	No	No	No	1	One	No	No	4+	Grand multigravida	3	Two-three	Health Center	Health facility	Yes	Second trimester	91	<200	Clinical stage-2	3177	≥1000	TLD	First-line regimen	80	>12	Negative	<1	<1	<1	<1	Negative	2022-04-26
143	2022-04-05	1994-10-29	27.4333	40-59	Urban	Self-employed	Primary education	Primary	Single	5000	2400 -12000	No	Don't know about it	No	No	Not applicable	No	No	No	2+	More than two	No	No	1	Primigravida	1	One	Health Center	Health facility	No	Second trimester	680	≥500	Clinical stage-1	Target Not Detected	<50	TLD	First-line regimen	36	>12	Negative	<1	<1	<1	<1	Negative	2022-04-26
144	2022-04-05	1989-07-15	32.7222	40-59	Urban	Unemployed	Primary education	Primary	Married	5000	2400 -12000	No	Don't know about it	No	No	Not applicable	No	No	No	2+	More than two	No	No	2	Multigravida	2	Two-three	Health Center	Health facility	No	Second trimester	Missing	Missing	Clinical stage-1	11	<50	TLD	First-line regimen	48	>12	Negative	<1	<1	<1	<1	Negative	2022-04-26
145	2022-04-05	2002-04-01	20.0111	40-59	Urban	Unemployed	Primary education	Primary	Married	2500	2400 -12000	No	Don't know about it	No	No	Not applicable	No	No	No	2+	More than two	No	No	2	Multigravida	1	One	Health Center	Health facility	No	Second trimester	621	≥500	Clinical stage-1	Target Not Detected	<50	TLD	First-line regimen	3	<6	Negative	<1	<1	<1	<1	Negative	2022-04-26
146	2022-04-05	1979-07-01	42.7611	40-59	Rural	Unemployed	Ordinary level	Secondary	Married	2000	< 2400	No	Don't know about it	No	Yes	Hospital	No	Yes	Yes	2+	More than two	Yes	Yes	3	Multigravida	2	Two-three	Health Center	Health facility	No	Second trimester	317	200-499	Clinical stage-1	Target Not Detected	<50	TLD	First-line regimen	95	>12	Negative	<1	<1	<1	<1	Negative	2022-04-26
147	2022-04-05	1971-05-09	50.9056	40-59	Rural	Unemployed	Primary education	Primary	Single	2000	< 2400	No	Don't know the place where it is given	No	No	Not applicable	No	Yes	No	1	One	No	No	4	Multigravida	3	Two-three	Health Center	Health facility	No	Second trimester	98	<200	Clinical stage-1	Target Not Detected	<50	TLD	First-line regimen	82	>12	Negative	<1	<1	<1	<1	Negative	2022-04-26
148	2022-04-05	1979-03-29	43.0167	40-59	Rural	Employed	Ordinary level	Secondary	Cohabiting	5000	2400 -12000	No	Don't know the place where it is given	Yes	No	Not applicable	No	Yes	No	1	One	No	No	3	Multigravida	2	Two-three	Health Center	Health facility	No	Second trimester	71	<200	Clinical stage-1	Target Not Detected	<50	TLD	First-line regimen	130	>12	Negative	<1	<1	<1	<1	Negative	2022-04-26
149	2022-04-05	1986-09-05	35.5833	40-59	Rural	Employed	Primary education	Primary	Married	2000	< 2400	No	Don't know the place where it is given	No	No	Not applicable	No	Yes	No	1	One	No	No	3	Multigravida	2	Two-three	Health Center	Health facility	No	Third trimester	103	<200	Clinical stage-1	Target Not Detected	<50	TLD	First-line regimen	167	>12	Negative	<1	<1	<1	<1	Negative	2022-04-26
150	2022-04-05	1994-08-05	27.6667	40-59	Rural	Self-employed	Primary education	Primary	Cohabiting	5000	2400 -12000	No	Expensive	No	No	Not applicable	No	No	No	2+	More than two	Yes-Syphilis	Yes	1	Primigravida	1	One	Health Center	Health facility	Yes	Third trimester	205	200-499	Clinical stage-1	40	<50	TLD	First-line regimen	129	>12	Negative	<1	<1	<1	<1	Negative	2022-04-26
151	2022-04-05	1987-07-15	34.7222	40-59	Rural	Self-employed	Primary education	Primary	Single	2000	< 2400	No	Expensive	No	No	Not applicable	No	Yes	No	1	One	No	No	2	Multigravida	2	Two-three	Home	Home	No	Third trimester	177	<200	Clinical stage-1	Target Not Detected	<50	TLD	First-line regimen	96	>12	Negative	<1	<1	<1	<1	Negative	2022-04-26
152	2022-04-05	1984-07-15	37.7222	40-59	Rural	Unemployed	Didn't attend school	Non-formal	Divorced	2000	< 2400	No	Don't know about it	Yes	No	Not applicable	Yes	Yes	No	1	One	No	No	4	Multigravida	3	Two-three	Health Center	Health facility	No	Third trimester	392	200-499	Clinical stage-1	Target Not Detected	<50	TLD	First-line regimen	132	>12	Negative	<1	<1	<1	<1	Negative	2022-04-26
153	2022-04-05	1979-11-30	42.3472	40-59	Rural	Unemployed	Ordinary level	Secondary	Widow	2000	< 2400	No	Don't know the place where it is given	No	No	Not applicable	Yes	Yes	No	1	One	No	No	1	Primigravida	1	One	Health Center	Health facility	No	Third trimester	417	200-499	Clinical stage-1	Target Not Detected	<50	TLD	First-line regimen	117	>12	Negative	<1	<1	<1	<1	Negative	2022-04-26
154	2022-04-05	1987-07-15	34.7222	40-59	Rural	Unemployed	Primary education	Primary	Single	2000	< 2400	No	Don't know about it	Yes	No	Not applicable	Yes	Yes	Yes	2+	More than two	No	No	4	Multigravida	3	Two-three	Health Center	Health facility	Yes	Third trimester	49	<200	Clinical stage-1	Target Not Detected	<50	TLD	First-line regimen	119	>12	Negative	<1	<1	<1	<1	Negative	2022-04-26
155	2022-04-05	1995-08-04	26.6694	40-59	Rural	Unemployed	Primary education	Primary	Single	2000	< 2400	No	Don't know about it	Yes	Yes	Hospital	Yes	Yes	No	2	Two	No	No	3	Multigravida	3	Two-three	Health Center	Health facility	No	Third trimester	94	<200	Clinical stage-1	Target Not Detected	<50	TLD	First-line regimen	32	>12	Negative	5.81	1-5	<1	<1	Positive	2022-04-26
156	2022-04-05	1988-05-03	33.9222	40-59	Rural	Unemployed	Primary education	Primary	Married	2000	< 2400	No	Don't know about it	Yes	No	Not applicable	No	Yes	Yes	1	One	No	No	1	Primigravida	1	One	Health Center	Health facility	No	Third trimester	86	<200	Clinical stage-1	20	<50	TLD	First-line regimen	11	6-12	Negative	<1	<1	<1	<1	Negative	2022-04-26
157	2022-04-05	1990-06-05	31.8333	40-59	Rural	Self-employed	Primary education	Primary	Cohabiting	2000	< 2400	No	Don't know the place where it is given	Yes	No	Not applicable	No	Yes	No	2+	More than two	No	No	2	Multigravida	2	Two-three	Health Center	Health facility	No	Third trimester	344	200-499	Clinical stage-1	Target Not Detected	<50	TLD	First-line regimen	93	>12	Negative	<1	<1	<1	<1	Negative	2022-04-26
158	2022-04-05	1988-04-24	33.9472	40-59	Rural	Self-employed	Primary education	Primary	Married	5000	2400 -12000	No	Don't know about it	Yes	Yes	Hospital	No	Yes	No	1	One	No	No	3	Multigravida	3	Two-three	Health Center	Health facility	No	Second trimester	32	<200	Clinical stage-1	36	<50	TLD	First-line regimen	16	>12	Negative	15.04	>10	2568.12	>1000	Positive	2022-04-26
159	2022-04-05	1992-07-07	29.7444	40-59	Rural	Unemployed	Primary education	Primary	Married	2000	< 2400	No	Don't know about it	Yes	Yes	Hospital	No	No	No	1	One	No	No	3	Multigravida	2	Two-three	Health Center	Health facility	No	Third trimester	360	200-499	Clinical stage-1	Target Not Detected	<50	TLD	First-line regimen	70	>12	Negative	<1	<1	<1	<1	Negative	2022-04-26
160	2022-04-05	1996-12-15	25.3056	40-59	Rural	Unemployed	Primary education	Primary	Cohabiting	2000	< 2400	No	Don't know about it	Yes	Yes	Hospital	Yes	Yes	No	1	One	No	No	3	Multigravida	2	Two-three	Health Center	Health facility	No	Third trimester	860	≥500	Clinical stage-1	Target Not Detected	<50	TLD	First-line regimen	66	>12	Negative	<1	<1	<1	<1	Negative	2022-04-26
161	2022-04-05	1997-11-16	24.3861	40-59	Rural	Unemployed	Ordinary level	Secondary	Divorced	2000	< 2400	No	Don't know about it	Yes	No	Not applicable	No	Yes	No	1	One	No	No	1	Primigravida	1	One	Health Center	Health facility	No	Third trimester	56	<200	Clinical stage-1	Target Not Detected	<50	TLD	First-line regimen	21	>12	Negative	<1	<1	<1	<1	Negative	2022-04-26
162	2022-04-05	1990-08-23	31.6167	40-59	Rural	Unemployed	Primary education	Primary	Married	2000	< 2400	No	Don't know the place where it is given	Yes	Yes	Hospital	Yes	Yes	No	1	One	No	No	3	Multigravida	2	Two-three	Health Center	Health facility	No	Third trimester	651	≥500	Clinical stage-1	20	<50	TLD	First-line regimen	73	>12	Negative	<1	<1	<1	<1	Negative	2022-04-26
163	2022-04-05	1994-07-15	27.7222	40-59	Rural	Self-employed	Primary education	Primary	Cohabiting	5000	2400 -12000	No	Don't know about it	No	Yes	Hospital	Yes	Yes	No	1	One	No	No	1	Primigravida	1	One	Health Center	Health facility	No	Third trimester	311	200-499	Clinical stage-1	Target Not Detected	<50	TLD	First-line regimen	50	>12	Negative	<1	<1	<1	<1	Negative	2022-04-26
164	2022-04-05	1990-07-15	31.7222	40-59	Rural	Unemployed	Primary education	Primary	Cohabiting	2000	< 2400	No	Don't know about it	Yes	No	Not applicable	No	Yes	No	2+	More than two	No	No	3	Multigravida	2	Two-three	Health Center	Health facility	No	Third trimester	357	200-499	Clinical stage-1	Target Not Detected	<50	TLD	First-line regimen	120	>12	Negative	<1	<1	<1	<1	Negative	2022-04-26
165	2022-04-05	1991-03-13	31.0611	40-59	Rural	Self-employed	Primary education	Primary	Cohabiting	5000	2400 -12000	No	Don't know about it	No	No	Not applicable	No	Yes	Yes	2	Two	No	No	2	Multigravida	2	Two-three	Regional Designated Hospital	Health facility	No	Third trimester	84	<200	Clinical stage-1	Target Not Detected	<50	TLD	First-line regimen	20	>12	Negative	<1	<1	<1	<1	Negative	2022-04-26
166	2022-04-05	1983-07-15	38.7222	18-39	Rural	Unemployed	Primary education	Primary	Cohabiting	2000	< 2400	No	Don't know about it	Yes	Yes	Hospital	Yes	Yes	No	2+	More than two	No	No	4	Multigravida	4	Four or more	Health Center	Health facility	No	Third trimester	122	<200	Clinical stage-1	Target Not Detected	<50	TLD	First-line regimen	119	>12	Positive	8.72	6-10	4551.19	>1000	Positive	2022-04-26
167	2022-04-05	1985-07-15	36.7222	40-59	Rural	Self-employed	Primary education	Primary	Widow	5000	2400 -12000	No	Don't know the place where it is given	Yes	No	Not applicable	No	Yes	No	1	One	No	No	1	Primigravida	1	One	Health Center	Health facility	No	Third trimester	214	200-499	Clinical stage-1	Target Not Detected	<50	TLD	First-line regimen	98	>12	Negative	<1	<1	<1	<1	Negative	2022-04-26
168	2022-04-05	1984-07-15	37.7222	40-59	Rural	Unemployed	Primary education	Primary	Cohabiting	2000	< 2400	No	Expensive	No	Yes	Hospital	Yes	Yes	No	1	One	No	No	3	Multigravida	1	One	Regional Designated Hospital	Health facility	No	Third trimester	Missing	Missing	Clinical stage-1	Target Not Detected	<50	TLD	First-line regimen	36	>12	Negative	<1	<1	<1	<1	Negative	2022-04-26
169	2022-04-05	1990-07-15	31.7222	40-59	Rural	Unemployed	Primary education	Primary	Married	2000	< 2400	No	Don't know about it	No	No	Not applicable	Yes	Yes	No	1	One	No	No	3	Multigravida	3	Two-three	Regional Designated Hospital	Health facility	No	Third trimester	Missing	Missing	Clinical stage-1	Target Not Detected	<50	TLD	First-line regimen	120	>12	Negative	8.7	6-10	<1	<1	Positive	2022-04-26
170	2022-04-05	2002-07-15	19.7222	40-59	Rural	Self-employed	Ordinary level	Secondary	Cohabiting	2000	< 2400	No	Don't know about it	No	No	Not applicable	No	Yes	No	1	One	No	No	1	Primigravida	1	One	Regional Designated Hospital	Health facility	No	Third trimester	Missing	Missing	Clinical stage-1	Target Not Detected	<50	TLD	First-line regimen	36	>12	Negative	<1	<1	<1	<1	Negative	2022-04-26
171	2022-04-05	1984-07-15	37.7222	40-59	Rural	Unemployed	Primary education	Primary	Cohabiting	2000	< 2400	No	Don't know the place where it is given	Yes	No	Not applicable	Yes	Yes	No	2	Two	No	No	2	Multigravida	2	Two-three	Health Center	Health facility	No	Third trimester	373	200-499	Clinical stage-1	Target Not Detected	<50	TLD	First-line regimen	83	>12	Negative	17.59	>10	<1	<1	Positive	2022-04-26
172	2022-04-05	1986-07-15	35.7222	40-59	Rural	Self-employed	Primary education	Primary	Cohabiting	5000	2400 -12000	No	Don't know about it	Yes	Yes	Hospital	No	Yes	No	1	One	No	No	3	Multigravida	2	Two-three	Health Center	Health facility	No	Third trimester	21	<200	Clinical stage-1	Target Not Detected	<50	TLD	First-line regimen	82	>12	Negative	<1	<1	6783.61	>1000	Negative	2022-04-26
173	2022-04-05	1989-04-03	33.0056	40-59	Rural	Unemployed	Primary education	Primary	Married	2000	< 2400	No	Don't know about it	Yes	No	Not applicable	Yes	Yes	No	1	One	No	No	4	Multigravida	2	Two-three	Health Center	Health facility	No	Third trimester	180	<200	Clinical stage-2	46	<50	2kA	Second-line regimen	153	>12	Negative	<1	<1	<1	<1	Negative	2022-04-26
174	2022-04-05	1982-09-10	39.5694	40-59	Rural	Unemployed	Ordinary level	Secondary	Married	2000	< 2400	No	Expensive	No	No	Not applicable	No	Yes	No	1	One	No	No	2	Multigravida	1	One	Health Center	Health facility	No	Third trimester	658	≥500	Clinical stage-1	40	<50	TLD	First-line regimen	69	>12	Negative	<1	<1	<1	<1	Negative	2022-04-26
175	2022-04-05	1988-07-06	33.7472	18-39	Rural	Self-employed	Primary education	Primary	Married	5000	2400 -12000	No	Don't know about it	Yes	Yes	Hospital	Yes	Yes	No	1	One	No	No	4	Multigravida	3	Two-three	Health Center	Health facility	No	Third trimester	206	200-499	Clinical stage-2	Target Not Detected	<50	1pA	First-line regimen	86	>12	Negative	<1	<1	<1	<1	Negative	2022-04-26
176	2022-04-05	1987-02-12	35.1472	18-39	Rural	Unemployed	Ordinary level	Secondary	Married	2000	< 2400	No	Don't know the place where it is given	Yes	No	Not applicable	No	Yes	No	1	One	No	No	3	Multigravida	2	Two-three	Dispensary	Health facility	No	Third trimester	103	<200	Clinical stage-2	1020	≥1000	TLD	First-line regimen	28	>12	Negative	<1	<1	<1	<1	Negative	2022-04-26
177	2022-04-05	1993-03-02	29.0917	18-39	Rural	Unemployed	Primary education	Primary	Divorced	500	< 2400	No	Don't know about it	No	No	Not applicable	No	No	No	1	One	No	No	3	Multigravida	3	Two-three	Health Center	Health facility	No	Third trimester	576	≥500	Clinical stage-1	20	<50	TLD	First-line regimen	42	>12	Negative	<1	<1	<1	<1	Negative	2022-04-26
178	2022-04-05	2004-07-15	17.7222	18-39	Rural	Unemployed	Primary education	Primary	Married	1000	< 2400	No	Don't know about it	No	No	Not applicable	No	No	No	1	One	No	No	1	Primigravida	1	One	Regional Designated Hospital	Health facility	No	Third trimester	601	≥500	Clinical stage-1	Missing	Missing	TLD	First-line regimen	7	6-12	Negative	<1	<1	<1	<1	Negative	2022-04-26
179	2022-04-06	1999-04-09	22.9917	18-39	Urban	Self-employed	Primary education	Primary	Married	2500	2400 -12000	No	Don't know about it	No	No	Not applicable	No	No	No	2+	More than two	No	No	3	Multigravida	3	Two-three	Health Center	Health facility	No	Third trimester	Missing	Missing	Clinical stage-1	Target Not Detected	<50	TLD	First-line regimen	10	6-12	Negative	<1	<1	<1	<1	Negative	2022-04-26
180	2022-04-06	1984-07-13	37.7306	18-39	Urban	Self-employed	Primary education	Primary	Married	3000	2400 -12000	No	Don't know the place where it is given	No	No	Not applicable	No	Yes	No	2	Two	No	No	4+	Grand multigravida	4	Four or more	Health Center	Health facility	No	Third trimester	Missing	Missing	Clinical stage-1	20	<50	TLD	First-line regimen	45	>12	Negative	<1	<1	<1	<1	Negative	2022-04-26
181	2022-04-06	1982-03-15	40.0583	40-59	Urban	Self-employed	Primary education	Primary	Married	3000	2400 -12000	No	Don't know about it	No	No	Not applicable	No	No	No	2+	More than two	No	No	3	Multigravida	3	Two-three	Health Center	Health facility	No	Third trimester	Missing	Missing	Clinical stage-1	Target Not Detected	<50	TLD	First-line regimen	107	>12	Negative	<1	<1	<1	<1	Negative	2022-04-26
182	2022-04-06	1983-01-01	39.2639	18-39	Urban	Self-employed	Primary education	Primary	Single	3000	2400 -12000	No	Don't know about it	No	No	Not applicable	No	No	No	2+	More than two	No	No	3	Multigravida	3	Two-three	Health Center	Health facility	No	Third trimester	Missing	Missing	Clinical stage-1	Target Not Detected	<50	TLD	First-line regimen	17	>12	Negative	<1	<1	<1	<1	Negative	2022-04-26
183	2022-04-06	1992-12-12	29.3167	18-39	Urban	Self-employed	Primary education	Primary	Married	3000	2400 -12000	No	Don't know about it	No	No	Not applicable	No	No	No	2+	More than two	No	No	2	Multigravida	2	Two-three	Health Center	Health facility	No	Third trimester	Missing	Missing	Clinical stage-1	Missing	Missing	TLD	First-line regimen	7	6-12	Negative	<1	<1	<1	<1	Negative	2022-04-26
184	2022-04-06	1979-07-15	42.725	40-59	Urban	Self-employed	Primary education	Primary	Married	4000	2400 -12000	No	Don't know about it	No	No	Not applicable	No	No	No	1	One	No	No	3	Multigravida	3	Two-three	Health Center	Health facility	No	Third trimester	375	200-499	Clinical stage-1	11	<50	TLD	First-line regimen	32	>12	Negative	<1	<1	<1	<1	Negative	2022-04-26
185	2022-04-06	1986-04-12	35.9833	18-39	Urban	Self-employed	Primary education	Primary	Married	4000	2400 -12000	No	Don't know about it	No	Yes	Hospital	Yes	No	No	2+	More than two	No	No	3	Multigravida	3	Two-three	Health Center	Health facility	No	Third trimester	Missing	Missing	Clinical stage-1	75	50-1000	TLD	First-line regimen	12	6-12	Negative	<1	<1	<1	<1	Negative	2022-04-26
186	2022-04-06	1988-12-22	33.2889	18-39	Urban	Self-employed	Primary education	Primary	Married	15000	>13000	No	Don't know about it	No	No	Not applicable	No	No	No	1	One	No	No	4	Multigravida	3	Two-three	Regional Designated Hospital	Health facility	No	Third trimester	284	200-499	Clinical stage-1	Target Not Detected	<50	TLD	First-line regimen	33	>12	Negative	<1	<1	<1	<1	Negative	2022-04-26
187	2022-04-06	1990-07-15	31.725	18-39	Urban	Self-employed	Ordinary level	Secondary	Single	10000	2400 -12000	No	Don't know about it	No	Yes	Hospital	Yes	No	No	1	One	No	No	2	Multigravida	1	One	Regional Designated Hospital	Health facility	Yes	Third trimester	165	<200	Clinical stage-1	65	50-1000	TLD	First-line regimen	47	>12	Negative	<1	<1	<1	<1	Negative	2022-04-26
188	2022-04-06	1975-11-29	46.3528	40-59	Urban	Unemployed	Didn't attend school	Non-formal	Married	10000	2400 -12000	No	Don't know about it	Yes	No	Not applicable	No	Yes	No	1	One	No	No	3	Multigravida	2	Two-three	Health Center	Health facility	Yes	Third trimester	602	≥500	Clinical stage-1	Target Not Detected	<50	TLD	First-line regimen	20	>12	Negative	<1	<1	<1	<1	Negative	2022-04-26
189	2022-04-06	1990-08-22	31.6222	18-39	Urban	Unemployed	Primary education	Primary	Divorced	2000	< 2400	No	Don't know about it	No	No	Not applicable	No	Yes	No	1	One	No	No	2	Multigravida	1	One	Health Center	Health facility	Yes	Third trimester	258	200-499	Clinical stage-1	90	50-1000	TLD	First-line regimen	27	>12	Negative	<1	<1	<1	<1	Negative	2022-04-26
190	2022-04-06	1989-04-16	32.9722	18-39	Urban	Self-employed	Ordinary level	Secondary	Married	20000	>13000	No	Don't know about it	No	No	Not applicable	Yes	No	No	1	One	No	No	2	Multigravida	1	One	Health Center	Health facility	No	Third trimester	351	200-499	Clinical stage-1	Target Not Detected	<50	TLD	First-line regimen	61	>12	Negative	<1	<1	<1	<1	Negative	2022-04-26
191	2022-04-06	1987-06-26	34.7778	18-39	Urban	Unemployed	Primary education	Primary	Single	5000	2400 -12000	No	Don't know about it	No	No	Not applicable	No	No	No	1	One	No	No	4	Multigravida	3	Two-three	Regional Designated Hospital	Health facility	Yes	Third trimester	405	200-499	Clinical stage-1	62	50-1000	TLD	First-line regimen	20	>12	Negative	8.86	6-10	4459.28	>1000	Positive	2022-04-26
192	2022-04-13	1983-06-15	38.8278	18-39	Urban	Unemployed	Didn't attend school	Non-formal	Married	2000	< 2400	No	Don't know about it	No	No	Not applicable	No	No	No	1	One	No	No	3	Multigravida	2	Two-three	Health Center	Health facility	No	Third trimester	164	<200	Clinical stage-1	Missing	Missing	TLD	First-line regimen	83	>12	Negative	<1	<1	<1	<1	Negative	2022-04-26
193	2022-04-20	1976-07-15	45.7639	40-59	Urban	Unemployed	Primary education	Primary	Single	5000	2400 -12000	No	Don't know about it	No	No	Not applicable	No	No	No	1	One	No	No	4	Multigravida	3	Two-three	Health Center	Health facility	No	Third trimester	486	200-499	Clinical stage-1	Target Not Detected	<50	2hA	Second-line regimen	221	>12	Positive	<1	<1	8078.52	>1000	Negative	2022-04-26
194	2022-04-20	1988-09-29	33.5583	18-39	Urban	Self-employed	Ordinary level	Secondary	Married	20000	>13000	No	Don't know about it	No	No	Not applicable	No	No	No	1	One	No	No	3	Multigravida	2	Two-three	Regional Designated Hospital	Health facility	No	Third trimester	702	≥500	Clinical stage-1	Target Not Detected	<50	TLD	First-line regimen	24	>12	Negative	<1	<1	<1	<1	Negative	2022-04-26
195	2022-04-20	1986-03-25	36.0694	18-39	Urban	Self-employed	Ordinary level	Secondary	Single	10000	2400 -12000	No	Don't know the place where it is given	Yes	Yes	Hospital	No	No	No	1	One	No	No	2	Multigravida	1	One	Regional Designated Hospital	Health facility	No	Third trimester	464	200-499	Clinical stage-2	Target Not Detected	<50	TLD	First-line regimen	84	>12	Negative	<1	<1	<1	<1	Negative	2022-04-26
196	2022-04-20	2000-06-27	21.8139	18-39	Urban	Unemployed	Diploma	College	Single	1000	< 2400	No	Don't know the place where it is given	No	No	Not applicable	No	Yes	No	1	One	No	No	1	Primigravida	1	One	Health Center	Health facility	No	Third trimester	361	200-499	Clinical stage-2	Missing	Missing	TLD	First-line regimen	36	>12	Negative	<1	<1	<1	<1	Negative	2022-04-26
197	2022-04-20	1989-06-15	32.8472	18-39	Urban	Self-employed	Diploma	College	Single	15000	>13000	No	Don't know about it	Yes	Yes	Hospital	No	No	No	1	One	No	No	2	Multigravida	1	One	Health Center	Health facility	Yes	Third trimester	220	200-499	Clinical stage-2	Target Not Detected	<50	TLD	First-line regimen	20	>12	Positive	<1	<1	6302.92	>1000	Negative	2022-04-26
198	2022-04-19	1989-07-07	32.7833	18-39	Rural	Employed	Ordinary level	Secondary	Married	5000	2400 -12000	No	Don't know the place where it is given	No	Yes	Hospital	No	Yes	No	1	One	No	No	3	Multigravida	2	Two-three	Health Center	Health facility	No	Third trimester	379	200-499	Clinical stage-2	40	<50	TLD	First-line regimen	59	>12	Negative	<1	<1	<1	<1	Negative	2022-04-26
199	2022-04-19	1986-01-14	36.2639	18-39	Rural	Unemployed	Primary education	Primary	Cohabiting	2000	< 2400	No	Don't know about it	Yes	No	Not applicable	No	Yes	No	2	Two	No	No	2	Multigravida	1	One	Health Center	Health facility	No	Third trimester	670	≥500	Clinical stage-1	Target Not Detected	<50	TLD	First-line regimen	46	>12	Negative	<1	<1	<1	<1	Negative	2022-04-26
200	2022-04-19	1988-06-03	33.8778	18-39	Rural	Self-employed	Primary education	Primary	Married	2000	< 2400	No	Don't know about it	Yes	No	Not applicable	No	Yes	No	1	One	No	No	3	Multigravida	2	Two-three	Health Center	Health facility	No	Third trimester	102	<200	Clinical stage-1	40	<50	2kA	Second-line regimen	38	>12	Negative	<1	<1	<1	<1	Negative	2022-04-26
201	2022-04-19	1999-11-27	22.3944	18-39	Rural	Self-employed	Primary education	Primary	Cohabiting	5000	2400 -12000	No	Don't know about it	Yes	No	Not applicable	No	Yes	No	2	Two	No	No	1	Primigravida	1	One	Health Center	Health facility	No	Third trimester	353	200-499	Clinical stage-1	Target Not Detected	<50	TLD	First-line regimen	47	>12	Negative	11.88	>10	<1	<1	Positive	2022-04-26
202	2022-04-19	1990-12-20	31.3306	18-39	Rural	Unemployed	Primary education	Primary	Married	2000	< 2400	No	Don't know about it	Yes	No	Not applicable	No	Yes	No	1	One	No	No	2	Multigravida	1	One	Health Center	Health facility	No	Third trimester	168	<200	Clinical stage-1	Target Not Detected	<50	TLD	First-line regimen	46	>12	Negative	<1	<1	<1	<1	Negative	2022-04-26
203	2022-04-19	1985-04-06	37.0361	18-39	Rural	Self-employed	Primary education	Primary	Married	2000	< 2400	No	Don't know the place where it is given	No	Yes	Hospital	Yes	Yes	No	1	One	No	No	2	Multigravida	1	One	Health Center	Health facility	No	Third trimester	229	200-499	Clinical stage-1	Target Not Detected	<50	TLD	First-line regimen	83	>12	Negative	<1	<1	<1	<1	Negative	2022-04-26
204	2022-04-19	1999-01-18	23.2528	18-39	Rural	Unemployed	Primary education	Primary	Cohabiting	2000	< 2400	No	Don't know the place where it is given	Yes	Yes	Hospital	No	Yes	No	1	One	No	No	1	Primigravida	1	One	Health Center	Health facility	No	Third trimester	185	<200	Clinical stage-1	Target Not Detected	<50	TLD	First-line regimen	22	>12	Negative	<1	<1	<1	<1	Negative	2022-04-26
205	2022-04-19	1986-07-13	35.7667	18-39	Rural	Unemployed	Primary education	Primary	Married	2000	< 2400	No	Don't know about it	Yes	No	Not applicable	No	Yes	No	1	One	No	No	3	Multigravida	2	Two-three	Health Center	Health facility	No	Third trimester	96	<200	Clinical stage-1	49	<50	TLD	First-line regimen	58	>12	Positive	14.33	>10	5564.95	>1000	Positive	2022-04-26
206	2022-04-19	1987-07-14	34.7639	18-39	Rural	Unemployed	Primary education	Primary	Married	2000	< 2400	No	Don't know about it	Yes	No	Not applicable	Yes	Yes	No	1	One	No	No	4	Multigravida	3	Two-three	Health Center	Health facility	No	Third trimester	422	200-499	Clinical stage-1	Target Not Detected	<50	TLD	First-line regimen	94	>12	Negative	<1	<1	<1	<1	Negative	2022-04-26
207	2022-04-19	1985-07-15	36.7611	18-39	Rural	Self-employed	Primary education	Primary	Married	2000	< 2400	No	Don't know about it	Yes	No	Not applicable	Yes	Yes	No	1	One	No	No	4	Multigravida	3	Two-three	Health Center	Health facility	No	Third trimester	26	<200	Clinical stage-2	Target Not Detected	<50	TLD	First-line regimen	33	>12	Negative	<1	<1	<1	<1	Negative	2022-04-26
208	2022-04-19	1983-02-06	39.2028	18-39	Rural	Unemployed	Primary education	Primary	Cohabiting	2000	< 2400	No	Don't know about it	Yes	No	Not applicable	No	Yes	No	1	One	No	No	3	Multigravida	2	Two-three	Health Center	Health facility	No	Third trimester	543	≥500	Clinical stage-2	Target Not Detected	<50	1pA	First-line regimen	69	>12	Negative	<1	<1	<1	<1	Negative	2022-04-26
209	2022-04-19	1987-12-25	34.3167	18-39	Rural	Self-employed	Primary education	Primary	Cohabiting	2000	< 2400	No	Don't know about it	Yes	No	Not applicable	No	Yes	No	2	Two	No	No	3	Multigravida	2	Two-three	Health Center	Health facility	No	Third trimester	116	<200	Clinical stage-2	70	50-1000	2hA	Second-line regimen	58	>12	Negative	<1	<1	<1	<1	Negative	2022-04-26
210	2022-04-19	1979-04-09	43.0278	40-59	Rural	Unemployed	Primary education	Primary	Single	2000	< 2400	No	Expensive	No	No	Not applicable	No	Yes	No	2	Two	No	No	3	Multigravida	3	Two-three	Regional Designated Hospital	Health facility	No	Third trimester	210	200-499	Clinical stage-1	Target Not Detected	<50	TLD	First-line regimen	84	>12	Negative	<1	<1	<1	<1	Negative	2022-04-26
211	2022-04-19	1988-08-03	33.7111	18-39	Rural	Self-employed	Primary education	Primary	Cohabiting	5000	2400 -12000	No	Don't know the place where it is given	Yes	Yes	Hospital	No	Yes	No	2	Two	No	No	3	Multigravida	2	Two-three	Health Center	Health facility	No	Second trimester	312	200-499	Clinical stage-1	Target Not Detected	<50	TLD	First-line regimen	62	>12	Negative	<1	<1	<1	<1	Negative	2022-04-26
212	2022-04-19	1981-06-24	40.8194	40-59	Rural	Unemployed	Primary education	Primary	Cohabiting	2000	< 2400	No	Don't know about it	Yes	No	Not applicable	Yes	Yes	No	2	Two	No	No	4+	Grand multigravida	4	Four or more	Health Center	Health facility	No	Second trimester	567	≥500	Clinical stage-1	Target Not Detected	<50	TLD	First-line regimen	29	>12	Negative	<1	<1	<1	<1	Negative	2022-04-26
213	2022-04-19	1985-04-04	37.0417	18-39	Rural	Self-employed	Ordinary level	Secondary	Married	5000	2400 -12000	No	Don't know about it	Yes	No	Not applicable	No	Yes	No	1	One	No	No	3	Multigravida	2	Two-three	Health Center	Health facility	No	Second trimester	40	<200	Clinical stage-2	Target Not Detected	<50	TLD	First-line regimen	96	>12	Negative	<1	<1	<1	<1	Negative	2022-04-26
214	2022-04-19	1985-07-15	36.7611	18-39	Rural	Unemployed	Primary education	Primary	Cohabiting	2000	< 2400	No	Don't know about it	No	No	Not applicable	No	Yes	No	2	Two	No	No	2	Multigravida	1	One	Regional Designated Hospital	Health facility	Yes	Second trimester	100	<200	Clinical stage-1	Target Not Detected	<50	TLD	First-line regimen	120	>12	Negative	<1	<1	<1	<1	Negative	2022-04-26
215	2022-04-19	1989-10-03	32.5444	18-39	Rural	Employed	Ordinary level	Secondary	Cohabiting	5000	2400 -12000	No	Don't know the place where it is given	No	Yes	Hospital	No	Yes	No	2	Two	No	No	3	Multigravida	2	Two-three	Health Center	Health facility	No	Second trimester	678	≥500	Clinical stage-1	Target Not Detected	<50	TLD	First-line regimen	69	>12	Negative	<1	<1	<1	<1	Negative	2022-04-26
216	2022-04-11	1984-06-15	37.8222	18-39	Urban	Employed	Primary education	Primary	Married	5000	2400 -12000	No	Don't know about it	No	No	Not applicable	No	No	No	2	Two	No	No	2	Multigravida	1	One	Health Center	Health facility	No	Second trimester	Missing	Missing	Clinical stage-1	Target Not Detected	<50	TLD	First-line regimen	174	>12	Negative	<1	<1	<1	<1	Negative	2022-04-26
217	2022-04-11	1981-08-15	40.6556	40-59	Urban	Self-employed	Primary education	Primary	Single	2000	< 2400	No	Don't know about it	No	No	Not applicable	No	No	No	2+	More than two	No	No	4	Multigravida	4	Four or more	Health Center	Health facility	No	Second trimester	Missing	Missing	Clinical stage-1	Target Not Detected	<50	TLD	First-line regimen	114	>12	Negative	10.98	>10	<1	<1	Positive	2022-04-26
218	2022-04-19	1984-08-18	37.6694	18-39	Urban	Unemployed	Primary education	Primary	Married	2500	2400 -12000	No	Don't know about it	No	No	Not applicable	No	Yes	No	2	Two	No	No	3	Multigravida	3	Two-three	Health Center	Health facility	No	Second trimester	460	200-499	Clinical stage-1	Target Not Detected	<50	TLD	First-line regimen	197	>12	Negative	10.72	>10	<1	<1	Positive	2022-04-26
219	2022-04-19	1985-07-01	36.8	18-39	Urban	Unemployed	Primary education	Primary	Married	2500	2400 -12000	No	Don't know about it	No	No	Not applicable	No	Yes	No	1	One	No	No	4	Multigravida	3	Two-three	Health Center	Health facility	No	Second trimester	214	200-499	Clinical stage-2	Target Not Detected	<50	TLD	First-line regimen	83	>12	Negative	<1	<1	<1	<1	Negative	2022-04-26
220	2022-04-19	2001-05-09	20.9444	18-39	Urban	Unemployed	Primary education	Primary	Single	2500	2400 -12000	No	Don't know about it	No	No	Not applicable	No	Yes	No	2	Two	No	No	2	Multigravida	1	One	Health Center	Health facility	No	Second trimester	300	200-499	Clinical stage-2	Target Not Detected	<50	TLD	First-line regimen	41	>12	Negative	<1	<1	<1	<1	Negative	2022-04-26
